1 **Glutathione S-transferase Pi (Gstp) Proteins Regulate Neuritogenesis in the Developing**

2 **Cerebral Cortex**

3

4 **Abbreviated Title**

5 Gstp regulates neurite formation

6

7 Xiaonan Liu, Sara M. Blazejewski, Sarah A. Bennison, and Kazuhito Toyo-oka\*

8

9 Department of Pharmacology and Physiology, Drexel University College of Medicine

10 Department of Neurobiology and Anatomy, Drexel University College of Medicine

11 Philadelphia, PA 19129 USA

12

13 **Corresponding Author\***

14 Kazuhito Toyo-oka, Ph.D.

15 Department of Neurobiology and Anatomy, Drexel University College of Medicine

16 Philadelphia, PA 19129 USA

17 Email: kt469@drexel.edu

18 Phone: (215) 991-8288

19 Fax: (215) 843-9082

20

21 Number of pages: 47

22 Number of figures: 7

23 Number of tables: 2

24 Number of multimedia: 2

25 Number of words for abstract: 247

26 Number of words for introduction: 991

27 Number of words for discussion: 1901

28

## 29 **Acknowledgments**

30 This work has been supported by a research grant from the NINDS (NS096098).

31

## 32 **Competing Interests**

33 There is no conflict of interest.

34

35 **Abstract**

36 GSTP proteins are metabolic enzymes involved in removal of oxidative stress and intracellular  
37 signaling and also have inhibitory effects on JNK activity. However, the functions of Gstp  
38 proteins in the developing brain are unknown. In mice, there are three Gstp proteins, Gstp1, 2  
39 and 3, while there is only one GSTP in humans. By RT-PCR analysis, we found that Gstp1 was  
40 expressed beginning at E15.5 in the cortex, but Gstp2 and 3 started expressing at E18.5. Gstp 1  
41 and 2 knockdown caused decreased neurite number in cortical neurons, implicating them in  
42 neurite initiation. Using *in utero* electroporation to knockdown Gstp1 and 2 in layer 2/3  
43 pyramidal neurons *in vivo*, we found abnormal swelling of the apical dendrite at P3 and reduced  
44 neurite number at P15. Using time-lapse live imaging, we found that the apical dendrite  
45 orientation was skewed compared to the control, but these defects were ameliorated.  
46 Overexpression of Gstp 1 or 2 resulted in changes in neurite length, suggesting a role in neurite  
47 elongation. We explored the molecular mechanism and found that JNK inhibition rescued  
48 reduced neurite number caused by Gstp knockdown, indicating that Gstp regulates neurite  
49 formation through JNK signaling. Thus, we found novel functions of Gstp proteins in neurite  
50 initiation during cortical development. Furthermore, the overexpression experiments suggest  
51 different functions of Gstp1 and 2 in neurite elongation. Since previous studies have shown the  
52 potential implication of Gstp in Autism Spectrum Disorder, our findings will attract more clinical  
53 interests in Gstp proteins in neurodevelopmental disorders.

54

55 **Significance**

56 Neurite formation, including neurite initiation and elongation, is the first step of generating  
57 polarized neuronal morphology in developing neurons, and thus is essential for establishing a  
58 neuronal network. Therefore, it is crucial to understand the mechanisms of neurite formation.  
59 Limited studies have been performed to clarify the mechanisms of neurite formation, especially  
60 neurite initiation. In this present study, we report a novel, essential role of Gstp in neurite  
61 initiation in mouse cortical neurons *in vitro* and *in vivo*. We also found that Gstp regulates  
62 neurite formation via JNK signaling pathways. These findings not only provide novel functions  
63 of Gstp proteins in neuritogenesis during cortical development but also help us to understand the  
64 complexity of neurite formation.

65

## 66 **Introduction**

67 Neurite formation includes neurite initiation and neurite elongation, and is the process where a  
68 neuron starts to gain morphological polarity. It is an extremely complicated process where a lot  
69 of internal and external factors are involved in both steps (Drubin et al., 1985; Perron and Bixby,  
70 1999). Neurite formation is fundamental for the development of the central nervous system, as it  
71 creates structural basis for neuronal connection, communication, and plasticity (Reese and  
72 Drapeau, 1998). In particular, neurite initiation is the cornerstone of neurite formation which  
73 neurite number primarily relies on (Schaefer et al., 2008; Harrill et al., 2010). Studying this  
74 process can help us understand the etiology of neurodevelopmental disorders, for example,  
75 autism spectrum disorder (ASD) and attention-deficit/hyperactivity disorder (ADHD), because  
76 recent studies have implicated defects of neuritogenesis in these disorders (Won et al., 2011;  
77 Bakos et al., 2015). Moreover, the model system used for the mechanistic analysis of neurite  
78 formation is shared with the study of neurite and axonal degeneration.

79  
80 GSTP belongs to the glutathione S-transferase (GST) family (Mannervik et al., 1985). GSTs are  
81 enzymes that catalyze the conjugation of glutathione to molecules, and therefore help further  
82 metabolize and excrete molecules from the cell. This reaction is critical because it is involved in  
83 detoxification and removal of oxidative stress (Goto et al., 2009; Aaker et al., 2016). There is  
84 one GSTP protein in humans, GSTP1. The human *GSTP1* gene is encoded in chromosome  
85 11q13 in the genome. It has been reported that a GSTP1 single nucleotide polymorphism (SNP)  
86 is associated with the neurological disorder, Tourette syndrome, which share some similar  
87 symptoms with ASD (Darrow et al., 2017). A SNP on the promoter region of the *GSTP1* gene  
88 has a significant association with this disorder (Shen et al., 2014). In mice, there are three *Gstp*

89 genes, *Gstp1*, *Gstp2* and *Gstp3*, which are encoded by three different, but adjacent regions on  
90 chromosome 19 (Xiang et al., 2014). Previous research showed *Gstp1* and 2 are ubiquitously  
91 expressed during embryonic stages in the central nervous system and throughout the mouse body  
92 except for the uterus (Knight et al., 2007). *Gstp3* was discovered more recently, and a limited  
93 number of studies have been done in terms of its expression and functions. Besides the  
94 enzymatic activity important for the detoxification of oxidative stress, GSTP1 is also involved in  
95 cellular signaling and cell proliferation (Zhang et al., 2014). Studies have shown that GSTP1 can  
96 inhibit the activation of several kinases, including JNK1(MAPK8) and Cdk5 (Adler et al., 1999;  
97 Wang et al., 2001; Sun et al., 2011). Thus, GSTP proteins have multiple functions and are  
98 essential for cellular signaling important for various types of cellular events.

99  
100 JNKs are kinases essential for cell proliferation and apoptosis. There are three JNK-encoding  
101 genes, and each of them can be alternatively spliced to form several variants (Gupta et al., 1996).  
102 It has been implicated that the C-terminus of GSTP1 directly interacts with the C-terminus of  
103 JNK1 (Monaco et al., 1999; Wang et al., 2001). This interaction leads to an inhibitory effect on  
104 JNK1 activation, which affects the cellular signaling cascade mediated by JNK1 activation. Also,  
105 GSTP1 binds to JNK2 and inhibits JNK2 activity (Thévenin et al., 2011). While there is no  
106 direct evidence showing the interaction between GSTP1 and JNK3, JNK3 has high homology to  
107 JNK1 suggesting that GSTP1 may also interact with JNK3 in a similar fashion as JNK1 (Sun et  
108 al., 2011). JNK signaling pathways are most notable for reacting to oxidative stress and inducing  
109 apoptosis (Shen and Liu, 2006). However, there is increasing evidence showing that JNK has  
110 non-apoptotic functions in neurons and is necessary for neuronal development (Eom et al., 2005;  
111 Seow et al., 2013). It has been shown that JNK proteins play multiple roles in neurite outgrowth

112 (Bennison et al., 2020). JNK1 is important for neurite elongation, and JNK2 and 3 are involved  
113 in both neurite initiation and elongation (Barnat et al., 2010). Notably, JNK proteins are involved  
114 in cytoskeletal organization via a variety of factors, including microtubule-associated protein 2  
115 (MAP2) and paxillin (Yamauchi et al., 2006; Komulainen et al., 2014). This is critical for  
116 neuritogenesis because the organization of cytoskeletal components, actin and microtubules, is  
117 key for neurite initiation and elongation, since they build tension and push the membrane  
118 outward to break the spherical shape, as well as push the neurite to grow in the later stages of  
119 neurite formation (Flynn, 2013).

120  
121 Thus, the previous studies about the link between JNKs and Gstp proteins implicates Gstp as an  
122 upstream regulator of JNKs in neurite formation. However, little has been studied about Gstp  
123 proteins in the developing cerebral cortex. In this study, by knocking down Gstp1 and 2 together  
124 in mouse primary neurons, we found that Gstp1 and 2 are involved in the formation of the  
125 correct number of neurites, suggesting their importance in neurite initiation. *In vivo* knockdown  
126 by *in utero* electroporation in the developing cerebral cortex showed defects in orientation of the  
127 apical dendrite at P3 and in neurite initiation of basal dendrites at P15. *Ex vivo* time-lapse live  
128 imaging of the P0 brain showed that the morphology of Gstp1/2-knockdown neurons  
129 dramatically changed with a disrupted angle of the apical dendrite as it emerged from the soma,  
130 suggesting that Gstp1 and 2 are important for correct apical dendrite orientation. Overexpression  
131 of each Gstp protein in primary cortical neurons revealed that Gstp1 overexpression caused  
132 decreased length of the shorter neurites, which will likely become dendrites, while Gstp2  
133 overexpression caused a decrease in length of the longest neurite, which will likely become the  
134 axon. By applying a global JNK inhibitor, which inhibits JNK1, 2 and 3, to Gstp-deficient

135 neurons, we found that the inhibition of JNKs' activity rescued the defects in neurite initiation  
136 caused by Gstp knockdown, indicating the importance of the Gstp/JNK signaling pathway in  
137 neurite initiation. Thus, our results provide the first evidence that Gstp1 and 2 are essential  
138 regulators of neuritogenesis, especially during neurite initiation via the JNK signaling pathway in  
139 the developing cortex.



140 **Materials and methods**

141 Mice

142 CD-1 mice used for IUE and primary cortical neuron culture were purchased from the Charles  
143 River (Wilmington, MA). All animals were maintained in accordance with the guidelines of the  
144 Drexel University Institutional Animal Care and Use Committee. Females and males were used  
145 for *in utero* electroporation and primary cortical neuron culture.

146

147 *Plasmids and chemicals*

148 Myc and DDK (FLAG)-tagged mouse Gstp1, Gstp2 and Gstp3 cDNA clones in the pCMV6-Entry  
149 vector were purchased from Origene (MR202273, MR202254, MR202253, Rockville, MD).  
150 shRNA for the knockdown of both Gstp1 and Gstp2, but not Gstp3, was designed by utilizing the  
151 web tools. They are siRNA Wizard Software (InvivoGen), BLOCK-iT RNAi Designer  
152 (ThermoFisher Scientific), and GPP Web Portal (Broad Institute). Target sequence,  
153 GGAGGTGGTTACCATAGAT, was cloned into pSCV2-Venus plasmid (Hand and Polleux,  
154 2011; Toyooka et al., 2014). ACTACCGTTGTTATAGGTG was used as a scramble shRNA.  
155 SP600125 (JNK inhibitor), and Roscovitine (Cdk5 inhibitor) were obtained from APEX BIO  
156 (Houston, Texas).

157

158 *Antibodies*

159 The following primary antibodies were used: anti-GSTP1 (Rabbit, Proteintech, 15902-1-AP), anti-  
160 GAPDH (Mouse, Proteintech, 60004-1-Ig), anti-DYKDDDDK (FLAG) Tag (Rat, Biolegend,  
161 clone L5, 637301), anti-Brn2 (Rabbit, Proteintech, 14596-1-AP). Anti- $\beta$ III-tubulin (mouse,  
162 Thermo Scientific, clone 2G10, MA1-118). The following secondary antibodies were used: HRP-

163 conjugated Goat anti-Rabbit IgG (Jackson ImmunoResearch Laboratories, 111-035-003), HRP-  
164 conjugated Goat anti-mouse IgG (Proteintech, SA00001-1), HRP-conjugated Donkey anti-Rat IgG  
165 (Jackson ImmunoResearch Laboratories, 712-035-153), FITC-conjugated Donkey-anti-Rabbit  
166 IgG (Jackson ImmunoResearch Laboratories, 711-096-152), TRITC-conjugated Donkey-anti-  
167 Rabbit IgG (Jackson ImmunoResearch Laboratories, 711-025-152), FITC-conjugated Donkey-  
168 anti-mouse IgG (Jackson ImmunoResearch Laboratories, 715-096-151).

169

#### 170 *Validation of shRNA knockdown efficiency*

171 HEK-293 cells were co-transfected with the plasmids coding the scramble shRNA or the Gstp1/2  
172 shRNA and Myc and DDK (FLAG)-tagged mouse Gstp1, Gstp2, and Gstp3 plasmids. The cells  
173 were cultured for 48 hours at 37°C with 95% air/5% CO<sub>2</sub>, and the protein lysates were prepared.  
174 The protein samples were separated on 12% SDS-PAGE gel. Knockdown efficiency was analyzed  
175 by quantifying the expression level of FLAG-tagged Gstp proteins after blotting with anti-FLAG  
176 antibody. GAPDH was used as a loading control. To analyze the KD efficiency on endogenous  
177 Gstp proteins, the plasmids coding scramble or Gstp shRNA were transfected into N2a cells and  
178 analyzed the efficiency with anti-GSTP1 antibody after 48 hours as described above.

179

#### 180 *In Utero Electroporation (IUE)*

181 Timed pregnant mice were obtained by the set-up of the mating in the animal facility. *In utero*  
182 electroporation (IUE) was performed as previously described (Cornell et al., 2016). Briefly, after  
183 pregnant dams were anesthetized, the uterine horns were exposed, and one to two microliters of  
184 plasmid mixed with 0.1% Fast Green were injected into the lateral ventricle of E15.5 embryo  
185 brains by pulled-glass micropipette. The concentration of the plasmid DNA was 1-2µg/µl. Three

186 32V electric pulses were applied into the embryonic brain by tweezers electrode using the  
187 electroporator (CUY21, Nepa GENE). The uterine horns were returned into the abdomen, and  
188 pups were allowed to recover and mature. The brains were dissected out at P0 for time-lapse live  
189 imaging and P3 and P15 for morphological analysis.

190

### 191 *Primary Cortical Neuron Culture*

192 Cortical neurons were prepared from mouse embryos at E15 as previously described (Pischedda  
193 et al., 2018). Briefly, the dam was euthanized, and embryos were quickly removed from the  
194 pregnant mouse. Then, embryos were placed in 1X Ca<sup>2+</sup>/Mg<sup>2+</sup>-free Dulbecco's PBS (D-PBS,  
195 Genesee Sci). After the cerebral cortices were dissected out, they were treated with 0.01%  
196 Trypsin in D-PBS for 5 minutes at room temperature, and then the trypsin is neutralized by  
197 adding 100µl of 50mg/ml bovine serum albumin. The dissociated neurons were seeded onto the  
198 dish coated with 100 ng/ml poly-D-lysine and 100ng/ml laminin with Neurobasal medium  
199 supplemented with 1% penicillin/streptomycin (Corning), 1% GlutaMAX (Gibco), and 1X B-27  
200 (Thermo Fischer Scientific). After 48 hours, cells were re-plated onto glass coverslips coated  
201 with poly-D-lysine and laminin and cultured for an additional 48 hours, and then fixed with 4%  
202 paraformaldehyde/Phosphate-buffered saline.

203

### 204 *Transfection*

205 Transfection in primary cortical neurons was performed using Amaxa Nucleofector II (Lonza)  
206 with the Ingenio electroporation kit (Mirus Bio). The concentration of plasmids we used was  
207 10µg with 100 µl of Ingenio electroporation solution. Five million neurons were used for  
208 transfection per experimental group.

209

210 *RNA isolation and RT-PCR*

211 The cerebral cortices were dissected from the cerebral cortex at E15.5, E18.5, P0, P5, and P15,  
212 and the total RNA was prepared using Trizol reagent (Thermo Fisher Scientific). The quality of  
213 RNA was confirmed by the value of 260nm/280nm and the clear appearance of 18S and 28S  
214 rRNAs on the agarose gel. To create cDNA for PCR, RNA was reversely transcribed using the  
215 MMLV reverse transcriptase (Thermo Fisher Scientific) and Oligo (dT) primer (Promega), and the  
216 following heat cycle was used for the reverse transcription: 25 °C 10 minutes, 37 °C 60 minutes,  
217 70 °C 10 minutes. Specific Gstp1, 2, and 3 primers were designed using the information about  
218 their DNA sequence. Gstp1 primers; forward primer:  
219 GGCAAATATGTCACCCTCATCTACACC, reverse primer:  
220 CCTTGATCTTGGGCCGGGCAC, Gstp2 primers; forward primer:  
221 CGGCAAATATGGCACCATGATCTACAGA, reverse primer:  
222 CCTTGATCTTGGGCCGGGCAC, Gstp3 primers; forward primer:  
223 CCTTACACCATCGTCGTCTATTTCCCTTCC, reverse primer:  
224 GATACTGCCGGGCAATGCGTCTG. PCR was performed using these specific primers with the  
225 following PCR heat cycle condition: 94 °C 5 min and 73 °C s 30 sec. This cycle was repeated 42  
226 cycles. The product sizes are 271, 272 and 319 bp for Gstp1, 2, and 3, respectively.

227

228 *Histology*

229 Brains were dissected out at P3 and P15 and fixed with 4% paraformaldehyde/Phosphate-buffered  
230 saline at 4°C overnight. Fixed samples were cryoprotected by 25% sucrose/Phosphate buffered  
231 saline for 48 hours at 4°C, and then embedded with the O.C.T. compound (Sakura). Cryosections

232 (60  $\mu$ M thickness) were cut by cryostat (Microm HM 505 N) and air-dried. Sections were washed  
233 three times with Tris-buffered saline (TBS) before use. All brain sections were stained with 4', 6-  
234 Diamidino-2-phenylindole, Dihydrochloride (DAPI, 600nM) and embedded with 90%  
235 glycerol/Phosphate buffered saline.

236

### 237 *Neuromorphological Analysis*

238 To analyze the neuronal morphology at P3 and P15 and primary neurons, Fiji software was used.  
239 Z-projection images were created from z-stack data collected by the confocal microscope (TCS  
240 SP2, Leica). The Fiji plug-in Simple Neurite Tracer was used to measure the length of the neurites  
241 extended from the surface of soma.

242

243 To analyze the apical dendrite orientation at P3, the angle was measured using the Fiji software  
244 angle tool. A straight line perpendicular to the pial surface of the brain slice was used as a reference  
245 for the angle. Absolute values of the angles measured were used for statistics.

246

### 247 *Sholl analysis*

248 Neurite branching pattern was quantified using Sholl analysis in Fiji software as previously  
249 described (Cornell et al., 2016). The center of soma was used as a reference, and the radius was  
250 set to 200 or 250  $\mu$ m with 5  $\mu$ m interval. From these parameters, the number of intersections at  
251 each radius was quantified and plotted using Prism7 (GraphPad).

252

### 253 *Ex Vivo Live Imaging on Brain Slices*

254 Brain slices were collected as previously described with a slight modification (Cornell et al., 2016).  
255 Briefly, Brains were dissected out from P0 embryos and placed in an ice-cold high sucrose artificial  
256 cerebral spinal fluid (ACSF) solution. The brains were embedded in 4% low-melting agarose in  
257 the ACSF solution. Coronal cortical slices were sectioned (300  $\mu$ m) with a vibrating microtome  
258 (VTS1000 Leica Microsystems) in ACSF. Slices were incubated for 60 minutes at 37°C in  
259 DMEM/F-12 imaging media supplemented with 10% fetal bovine serum (FBS) for recovery.  
260 Slices were gently transferred into a 35 mm Petri dish (Nunc) for imaging. The brain slices were  
261 covered by 80% collagen I (Gibco, Fisher Scientific) neutralized with 0.25 N sodium hydroxides  
262 in PBS. Imaging was performed on an upright confocal laser-scanning microscope (TCS SP2  
263 VIS/405, Leica) with a 20X HCX APO L waster-dipping objective (NA 0.5). During imaging,  
264 slices were incubated in DMEM/F-12 imaging media supplied with 10% FBS without phenol red  
265 and incubated at 37°C overnight in stage top chamber incubator (DH-40iL, Warner Instruments).  
266 Confocal stack images were taken at 10-minute intervals for up to 10 hours. The Z-projections  
267 were created using Fuji for each time point, and the z-projections of all time points were used to  
268 make a video. The neurite length, velocity, and angle were measured and analyzed using Fuji  
269 software and plotted using Prism7 (GraphPad).

270

### 271 *Statistical Analysis*

272 Quantitative data were subjected to statistical analysis using Prism 7 (GraphPad). The data were  
273 analyzed by two-tailed unpaired t-tests, one-way ANOVA with Dunnett's multiple comparisons,  
274 one-way ANOVA, or two-way ANOVA with Tukey's multiple comparisons if appropriate. Values  
275 represented as mean  $\pm$  SEM. Results were deemed statistically significant if the p value was <0.05.  
276 \*, \*\*, \*\*\* and \*\*\*\* indicate p <0.05, p <0.01, p<0.001 and p <0.0001, respectively.

277 **Results**

278 *Gstp* proteins are expressed during cortical development, and their polarized distribution was  
279 observed during neurite formation

280 A previous report showed that *Gstp1*, 2, and 3 had different expression patterns in the mouse  
281 brain (Visel et al., 2004; Diez-Roux et al., 2011). However, as far as we know, there are no  
282 specific antibodies for *Gstp1*, 2, and 3 available commercially. Therefore, we used the anti-  
283 GSTP1 antibody to detect the expression level of *Gstp* proteins. First, we tested the specificity of  
284 the antibody against each *Gstp* (Figure 1A). We overexpressed FLAG-tagged *Gstp1*, *Gstp2*, or  
285 *Gstp3* in HEK-293T cells respectively, and the protein lysates from each group were tested by  
286 Western blot. Anti-GSTP1 antibody detected all three *Gstp* proteins. Using protein lysates from  
287 the cerebral cortex at E13.5, E15.5, E17.5, and P0, we tested the expression levels of *Gstp*  
288 proteins during the development of the cerebral cortex and found that *Gstp* proteins were  
289 expressed throughout all tested stages of cortical development (Figures 1B and C).

290  
291 Since the antibody recognizes all mouse *Gstp* isoforms, we created specific primer sets for each  
292 *Gstp* mRNA to further examine the expression of each *Gstp* mRNA in the developing cortex  
293 (Figure 1D). Using the plasmids coding *Gstp1*, 2, and 3 and the specific primers, we performed  
294 PCR and confirmed that each primer set is specific for each *Gstp* gene. Next, we tested the  
295 expression pattern of each *Gstp* mRNA in the developing cortex by RT-PCR and found that  
296 *Gstp1* started expressing at E15.5 and remained expressed throughout all the time points from  
297 E15.5 to P15 (Figure 1E). *Gstp2* and 3 started expressing at E18.5, and their expression  
298 continued until at least P15. Thus, these experiments suggest that *Gstp1* is the main *Gstp*  
299 involved in early cortical development in the embryonic brain.

300

301 To determine the cellular localization of Gstp proteins, we conducted immunostaining using the  
302 anti-GSTP1 antibody in primary cortical neurons at four different stages of neurite formation, 0  
303 hours after plating (non-polarized stage, Figure 1F), 4 hours (early neurite initiation, Figure 1G),  
304 6 hours (late neurite initiation, Figure 1H), and 2 days (neurite extension, Figure 1I). In non-  
305 polarized stage, Gstp was ubiquitously expressed in the cytoplasm and the nucleus (Figure 1F).  
306 In the early and late neurite initiation, Gstp expression was observed in the cytoplasm and the  
307 nucleus, but concentrated accumulations were observed in the cytoplasm (Figure 1G and H).  
308 During neurite extension, Gstp protein was ubiquitously expressed in the cytoplasm, neurites,  
309 and the nucleus with less degree (Figure 1H).

310

311 Immunohistochemical analysis revealed that Gstp proteins were expressed at the cortical plate  
312 (CP) at P3 (Figure 1J) and P15 (Figure 1K). Gstp proteins were strongly expressed in the soma,  
313 but weakly or at minimum in the axon and dendrites both at P3 and P15 (Figures 1J and K, right  
314 panels).

315

316 Thus, Gstp proteins, especially Gstp1, are expressed in the developing cortex. Their polarized  
317 expression in the cytoplasm suggests a role for Gstp proteins in neurite formation during cortical  
318 development.

319

320 *Knockdown of Gstp1 and 2 caused decreased neurite number from the soma and defects in the*  
321 *branching of neurites of cortical neurons*



322 We found that Gstp proteins are expressed in the developing cortex (Figure 1), while their roles  
323 in cortical neurons have not been clarified. In mouse, there are three *Gstp* genes encoding Gstp1,  
324 2, and 3, while humans have only one, *GSTP1*. We aligned human GSTP1 and mouse Gstp1, 2,  
325 and 3 nucleotide and protein sequences and found that mouse Gstp1 has the highest homology to  
326 human GSTP1 with 83.25% identity in nucleotide sequence and 85.24% identity in amino acid  
327 sequence (Tables 1 and 2). Mouse Gstp1 and 2 show 98.1% and 97.14% identity in nucleotide  
328 and an amino acid sequence, respectively, while mouse Gstp3 shares less similarity with Gstp1  
329 and Gstp2 (71.56% and 71.56% in nucleotide and 70% and 70.48% in amino acid). Therefore,  
330 we designed the shRNA in order to specifically knock down both Gstp1 and 2 at the same time,  
331 but not Gstp3, by using the website-based siRNA sequence prediction tools (See the Materials  
332 and Methods for more details). We confirmed the specificity of the shRNA using HEK-293 cells  
333 overexpressing the plasmids coding FLAG-tagged Gstp1, 2, and 3 and scramble shRNA or Gstp  
334 shRNA (Figure 2A). The knockdown efficiency was approximately 85% and 95% to Gstp1 and  
335 Gstp2, respectively. To analyze the knockdown efficiency of endogenous Gstp proteins, we used  
336 a mouse neuroblastoma cell line, N-2a cells. The knockdown efficiency of the Gstp1/2 shRNA  
337 was 41% in the endogenous Gstp proteins compared to the cells transfected with plasmid coding  
338 the scramble shRNA (Figure 2B). This could be caused because N-2a cells express all Gstp  
339 proteins. To confirm this, we performed RT-PCR in N-2a cells and found that N-2a cells  
340 expressed Gstp1 and 3, but not Gstp2 (Figure 2C). Thus, we determined that the shRNA we  
341 designed was specific to Gstp1 and 2.

342

343

344 To analyze the functions of Gstp1 and 2 in neuromorphogenesis, we transfected primary cortical  
345 neurons with the plasmid coding either the scramble shRNA or the Gstp shRNA and cultured for  
346 48 hours as described in the methods (Figure 2D). We re-plated the neurons onto cover slips  
347 after 48 hours, which allowed time for the shRNA to be fully expressed before the re-plating  
348 occurred. Neurite length, neurite number, and branching pattern were analyzed at 48 hours after  
349 re-plating. We found the neurons transfected with KD plasmid ( $4.12 \pm 0.2403$ ) had less neurites  
350 at 48 hours after re-plating compared to the control neurons ( $5.64 \pm 0.2638$ ) transfected with the  
351 plasmid coding scramble shRNA (scramble,  $5.64 \pm 0.2638$ ; KD,  $4.12 \pm 0.2403$ ; unpaired t-test:  
352  $t(48)=4.26$ , \*\*\*\*\*,  $p<0.0001$ ) (Figures 2E). This suggests that Gstp proteins are essential for  
353 neurite initiation. Most of the cortical neurons have 5 to 6 neurites from the soma, while most of  
354 the KD neurons have 4 neurites from the soma (Figure 2F). No significant difference was  
355 observed in the length of the longest neurite, which will likely become the axon (scramble,  $134 \pm$   
356  $5.94$ ; KD  $140.9 \pm 6.424$ ; unpaired t-test:  $t(4)=0.79$ ,  $p=0.4312$ ) (Figure 2G), as well as the length  
357 of the shorter neurites, which will likely become dendrites (scramble,  $140.9 \pm 9.114$ ; KD,  $160.1$   
358  $\pm 18.06$ ; Unpaired t-test:  $t(4)=0.95$ ,  $p=0.3485$ ) (Figure 2H). Sholl analysis showed that the KD  
359 neurons had less neurite branching close to soma at 10  $\mu\text{m}$  and 15  $\mu\text{m}$ , but more branching from  
360 35  $\mu\text{m}$  to 50  $\mu\text{m}$  (Figure 2I). These data suggest that Gstp1 and 2 are important for neurite  
361 initiation and neurite branching in a region-specific manner.

362

363 *Knockdown of Gstp1 and 2 in vivo showed abnormal dendrite morphology and defects in neurite*  
364 *initiation.*

365 To study the function of Gstp1 and 2 in neurite formation *in vivo*, we performed *in utero*

366 electroporation (IUE) with the plasmids coding for scramble or Gstp1/2 KD shRNA. IUE was

367 performed at E15.5 to mark pyramidal neurons in layers 2/3 (Brn2 positive) as previously  
368 described (Taniguchi et al., 2012). Gstp1/2 KD pyramidal neurons reached their final destination,  
369 layers 2/3 in the cortical plate, indicating that there were no defects in neurogenesis and neuronal  
370 migration (Figure 3A). Since *in vitro* knockdown experiments showed that Gstp1/2 KD neurons  
371 did not affect the length of the longest neurite, which likely becomes the axon, we focused the  
372 analysis on dendritic formation *in vivo*. At P3, we analyzed the morphology of neurons, which  
373 were visualized by Venus fluorescent proteins coded on the same plasmid coding for shRNA.  
374 We began our analysis at P3 so we could analyze the morphology of the apical dendrite, because  
375 basal dendrites have not emerged or are minimally emerged at this time point.  
376 We measured the angle from the soma for the quantitative study of the apical dendrite  
377 orientation. For measuring the angle from the soma, we manually set up the reference line  
378 perpendicular to the pial surface of the brain. We found that KD neurons had increased angle of  
379 the apical dendrite compared to the scramble neurons (scramble,  $14.48 \pm 1.769$  degrees; KD,  
380  $20.56 \pm 1.822$  degrees; unpaired t-test:  $t(68)=2.39$ , \*,  $p=0.0194$ ) (Figure 3B). We also observed a  
381 thicker apical dendrite in neurons deficient in Gstp1 and 2, especially in the proximal region of  
382 the apical dendrite (scramble,  $1.480 \pm 0.1074$   $\mu\text{m}$ ; KD,  $2.166 \pm 0.125$   $\mu\text{m}$ ; unpaired t-test:  
383  $t(48)=4.166$ , \*\*\*,  $p<0.001$ ) (Figures 3C). We measured the width of the soma both in the  
384 scramble and knockdown neurons, and there is no significant difference between the two groups  
385 (scramble,  $7.032 \pm 0.2462$   $\mu\text{m}$ ; KD,  $6.423 \pm 0.2097$   $\mu\text{m}$ ; unpaired t-test:  $t(48)=1.885$ ,  $p=0.0655$ )  
386 (Figure 3D). Then, we calculated the ratio of the width of the apical dendrite against the width of  
387 the soma, and found that the width of the apical dendrite in KD neurons was significantly wider  
388 than in scramble neurons (scramble group,  $0.2121 \pm 0.0151$ ; knockdown group,  $0.3394 \pm 0.01775$ ;  
389 unpaired t-test:  $t(48)=5.464$ , \*\*\*\*,  $p<0.0001$ ) (Figure 3E). Since there is no significant difference

390 in the width of the soma between the control and KD neurons, the Gstp KD deficiency causes the  
391 swelling in the apical dendrite, not the entire cell. Taken together, these results suggest the  
392 importance of Gstp1/2 in proper morphogenesis of the apical dendrite. Meanwhile, there is no  
393 significant difference in the length of the apical dendrite between Gstp KD and scramble  
394 neurons, (scramble,  $96.06 \pm 5.537 \mu\text{m}$ ; KD,  $82.21 \pm 6.192 \mu\text{m}$ ; unpaired t-test:  $t(48)=1.67$ ,  
395  $p=0.1022$ ) (Figure 3F). Thus, the Gstp KD caused the defects both in apical dendrite orientation  
396 and morphology, but not length.

397

398 *In vivo knockdown of Gstp1 and 2 using shRNA resulted in defects in neurite initiation of basal*  
399 *dendrites at P15*

400 Next, we analyzed dendrite number, apical dendrite length, the width of the apical dendrite, and  
401 neurite branching at P15 (Figure 4). We confirmed that KD pyramidal neurons stayed in layers  
402 2/3 (Brn2 positive) at P15 (Figures 4A). We found that knockdown of Gstp1 and 2 caused  
403 significant defect in neurite number from the soma compared to the scramble neurons (scramble,  
404  $4.92 \pm 0.223$ ; KD,  $4.08 \pm 0.199$ ; unpaired t-test:  $t(48)=2.808$ , \*\*  $p=0.0072$ ) (Figure 4B),  
405 reflecting the decrease of the number of basal dendrites, because we observed the correct  
406 formation of the apical dendrite in the KD neurons at P15. No defect was found in the length of  
407 the apical dendrite (scramble,  $340.1 \pm 26.68$ ; KD,  $292.5 \pm 21.42$ ; unpaired t-test:  $t(48)=1.393$ ,  
408  $p=0.1702$ ) and the total length of the dendrites (scramble,  $621.073 \pm 56.448$ ; KD,  $491.443 \pm$   
409  $33.171$ ; unpaired t-test:  $t(48)=1.98$ ,  $p=0.0535$ ). (Figure 4C and D). Although we found the  
410 abnormal width of the apical dendrite at P3, there is no difference in the width of apical dendrite,  
411 the soma, or the ratio between Gstp KD and control neurons at P15 (apical dendrite: scramble,  
412  $1.770 \pm 0.111$ ; KD,  $1.646 \pm 0.083$ ; unpaired t-test:  $t(48)=0.89$ ,  $p=0.377$ , soma: scramble,  $11.66 \pm$

413 0.588; knockdown,  $11.54 \pm 0.29$ ; unpaired t-test:  $t(48)=0.18$ ,  $p=0.8555$ , Ratio: scramble, 0.1442  
414  $\pm 0.0077$ ; KD,  $0.1561 \pm 0.0087$ ; unpaired t-test:  $t(48)=1.022$ ,  $p=0.3117$ ) (Figures 4E-G). Sholl  
415 analysis showed a decrease in intersections only close to soma when Gstp1 and 2 were knocked  
416 down, and there are no defects in branching pattern at distal regions (longer than 25  $\mu\text{m}$ ) from  
417 the soma (Figure 4H).

418  
419 Together, these results suggest that Gstp 1 and 2 are essential for proper morphogenesis of the  
420 apical dendrite at the early stage of neurite formation and the proper initial formation of basal  
421 dendrites at the later stage.

422  
423 *Time-lapse live imaging revealed the importance of Gstp1 and 2 in the orientation of neurites in*  
424 *neurite initiation*

425 We found that Gstp1 and 2 are essential for neurite initiation *in vitro* and *in vivo* (Figures 2 and  
426 4). To study how Gstp KD affects the dynamics of neurite initiation, we utilized *ex vivo* time-  
427 lapse live imaging in combination with IUE (Figure 5A and B and Supplemental Videos 1 and  
428 2). Mouse brain slices were prepared at P0 after IUE which was performed at E15.5, and then the  
429 process of neurite formation was recorded for 10 hours with 10 minute intervals.

430  
431 At the beginning of the live imaging at P0, almost all pyramidal neurons arrived at the cortical  
432 plate and most of them started extending multiple neurites. In the wildtype condition, one of the  
433 neurites extends to the pial surface, and this likely becomes the apical dendrite. Another neurite  
434 often extends in the opposite direction toward the intermediate zone , and this likely becomes the  
435 axon. In addition to these two extensions, some neurons extend an additional couple of neurites

436 from the lateral region of soma, but these neurites would disappear after repeating their extension  
437 and retraction several times, this happens at the early time points during the 10-hr live imaging  
438 from P0. In this study, all analyses were performed on the neurite likely to become the apical  
439 dendrite.

440

441 There was no significant difference in neurite length between the scramble and KD neurons at  
442 the beginning of the recording. To study the growth dynamics of the neurites in scramble and  
443 KD groups, the length at each time point was normalized by subtracting the length at time 0 from  
444 each (Figure 5C). The neurites on both scramble and KD neurons displayed constant growth and  
445 retraction throughout the time of recording, while the length of the apical dendrite in KD neurons  
446 was shorter at the beginning (0-250 minutes) (Figure 5C, orange line), it caught up to the same  
447 length as the control group after 250 minutes. During the neurite formation process, both  
448 scramble and KD neurons showed dynamic changes in the velocity of neurite formation (Figure  
449 5D). There was no difference in the average velocity between the control and KD neurons  
450 (scramble grow,  $0.673 \pm 0.03116$ ; scramble retract,  $0.1589 \pm 0.02867$ ; KD grow,  $0.1485 \pm$   
451  $0.009861$ ; KD retract,  $0.148 \pm 0.01358$ ) (Figure 5E). However, there is a significant difference in  
452 the frequency of retraction, where KD neurons had less retraction frequency during 10 hours  
453 than the scramble neurons, although there is no difference in growth frequency (scramble,  $27.8 \pm$   
454  $0.5538$ ; KD,  $25.7 \pm 0.5783$ ; unpaired t-test:  $t(18)=2.623$ , \*,  $p=0.0173$ ) (Figure 5F). This could be  
455 the reason why the neurites on KD neurons catch up to the length of scramble neurites during  
456 live imaging, though KD neurites are shorter than the control at the early time points of the live  
457 imaging (Figure 5C).

458

459 During the recording, we noticed that neurite tips of KD neurons were more dynamically moving  
460 than the ones of the scramble neurons. Therefore, we analyzed the angle and frequency of the tip  
461 turning at each time point (Figure 5G). We found that the tip of the apical dendrite in the KD  
462 neurons turned more frequently than the control neurons during 10-hour recording (scramble,  
463  $12.7 \pm 1.732$ ; KD,  $21.5 \pm 1.47$ ; unpaired t-test:  $t(18)=3.676$ , \*\*  $p=0.0011$ ) (Figure 5H). We  
464 measured the angle every time the neurite changes direction (the average angle per turning of the  
465 apical dendrite tip) and found that KD neurons turned in larger angles than the scramble neurons  
466 (scramble,  $18.83 \pm 1.664$  degrees; KD,  $23.51 \pm 1.352$  degrees; unpaired t-test:  $t(18)=0.2096$ , \*  
467  $p=0.00424$ ) (Figure 5I). Thus, the neurite tips in the KD neurons displayed more dynamic  
468 movement during the extension of the apical dendrite than the scramble neurons, indicating the  
469 role of *Gstp1* and *2* in the outgrowth of the apical dendrite.

470  
471 The angle of apical dendrite from soma was also analyzed (Figure 5J). The starting angles (time  
472 0) were measured, and we found that the angle in the KD neurons was significantly larger than  
473 the scramble (scramble,  $14.9 \pm 2.529$ ; KD,  $42.16 \pm 8.05$ ; unpaired t-test:  $t(48)=3.23$ , \*\*  
474  $p=0.0022$ ) (Figure 5K). We also measured the angle every 10 minutes for 10 hours and  
475 calculated the changes in the angle (Figure 5L). A positive value represents an increase in the  
476 angle, in other words, the apical dendrite moves away from the perpendicular reference line and  
477 the pial surface. On the other hand, a negative value represents a decrease in the angle, indicating  
478 that the apical dendrite approaches the pial surface. We found that both the KD and scramble  
479 neurons decreased the angle over time, but the KD neurons more frequently changed the angle of  
480 the apical dendrite, indicating that KD neurons tried to rectify the angle to the level of the

481 scramble group even though the apical dendrite in KD neurons emerged from the soma in the  
482 wrong direction.

483

484 Overall, these observations indicate that Gstp 1 and 2 are important for the formation of the  
485 apical dendrite orientation when the apical dendrite emerges from the soma, especially in the  
486 initial stage.

487

488 *Overexpression of Gstp1 and 2 in cortical neurons led to morphological defects*

489 The knockdown experiments revealed the importance of Gstp1 and 2 in neuromorphogenesis *in*  
490 *vitro* and *in vivo* (Figures 2-5). Our shRNA knocked down both Gstp1 and 2 at the same time so  
491 that the function of each Gstp in neuromorphogenesis remains unrevealed. Although the  
492 overexpression is not a true functional analysis, it can still reveal important mechanistic  
493 information. Therefore, in order to study Gstp1 and 2 separately, we overexpressed Gstp1 or 2 in  
494 primary cortical neurons and co-transfected with plasmid encoding YFP to visualize the  
495 morphology (Figure 6A). Transfection was performed using primary cortical neurons prepared  
496 from E15.5 embryos, and then neurons were cultured for 48 hours followed by re-plating. We  
497 analyzed neurite number, neurite length, and branching pattern, by comparing with neurons  
498 transfected with YFP alone 48 hours following re-plating (control group). Overexpression of  
499 Gstp1 caused a significant decrease of total neurite length in comparison to YFP transfected  
500 neurons (control,  $344.3 \pm 18.79 \mu\text{m}$ ; Gstp1 overexpression,  $244.9 \pm 11.72 \mu\text{m}$ ; one-way ANOVA  
501 with Tukey's multiple comparison,  $F_{(2,72)}=1.989$ , \*  $P < 0.0001$ ), as well as the length of shorter  
502 neurites (control,  $186.7 \pm 14.89 \mu\text{m}$ ; Gstp1 overexpression,  $115.7 \pm 9.084 \mu\text{m}$ ; one-way ANOVA  
503 with Tukey's multiple comparison,  $F_{(2,72)}=1.455$ , \*\*\*  $P = 0.0006$ ). There was no significant



504 difference in the length of the longest neurite in Gstp1-overexpressing neurons (longest neurite  
505 length,  $125.1 \pm 7.928 \mu\text{m}$ ), compared to YFP transfected control neurons (longest neurite length,  
506  $152.1 \pm 9.625 \mu\text{m}$ ; one-way ANOVA with Tukey's multiple comparison,  $F_{(2,72)}=1.097$ , ns,  
507  $P=0.1390$ ) (Figures 6B-D). The number of neurites from soma was also analyzed, but there was  
508 no significant difference between the control and Gstp1-overexpressing neurons (neurite number  
509 in the control neurons,  $5.04 \pm 0.3978$ , neurite number in the KD neurons,  $5.2 \pm 0.2449$ ; one-way  
510 ANOVA with Tukey's multiple comparison,  $F_{(2,72)}=2.75$ ,  $P>0.99$ ) (Figure 6E). Sholl analysis  
511 showed that Gstp1 overexpression caused a significant decrease in neurite branching at proximal  
512 region from soma from 20 to  $45 \mu\text{m}$  (One-way ANOVA with Tukey's multiple comparison, 20  
513  $\mu\text{m}$ , \*\*  $p=0.0132$ ; 25  $\mu\text{m}$ , \*\*\*  $P=0.0001$ ; 30  $\mu\text{m}$ , \*\*\*  $P=0.0006$ ; 35  $\mu\text{m}$ , \*\*\*  $P=0.0001$ ; 40  $\mu\text{m}$ ,  
514 \*\*  $P=0.0093$ ; 45  $\mu\text{m}$ , \*  $P=0.0308$ ) (Figure 6F).

515  
516 Overexpression of Gstp2 caused a slight but not significant increase in the length of shorter  
517 neurites (control,  $186.7 \pm 18.42 \mu\text{m}$ ; Gstp2 overexpression,  $222 \pm 13.25 \mu\text{m}$ ; one-way ANOVA  
518 with Tukey's multiple comparison,  $F_{(2,72)}=1.455$ ,  $P=0.1295$ ) (Figure 6C, cobalt and pink bars).  
519 The length of the longest neurite length had a slight but not significant decrease ( $125.9 \pm 7.928$   
520  $\mu\text{m}$ ; one-way ANOVA with Tukey's multiple comparison,  $F_{(2,72)}=1.097$ ,  $P=0.0708$ ) (Figure 6D).  
521 No significant changes were observed in the length of the total neurites as well as neurite number  
522 from the soma (total neurite,  $347.9 \pm 13.81 \mu\text{m}$ , one-way ANOVA with Tukey's multiple  
523 comparison,  $F_{(2,72)}=1.989$ ,  $p=0.9901$ ; neurite number,  $5.56 \pm 0.3270$ , one-way ANOVA with  
524 Tukey's multiple comparison,  $F_{(2,72)}=2.75$ ,  $P=0.5069$ ) (Figures 6B and E). Sholl analysis showed  
525 a trend of increasing branching by Gstp2 overexpression, but it is not statistically significant  
526 (Figure 6F).

527

528 Overall, the overexpression experiments suggest that Gstp1 and 2 play important roles in neurite  
529 formation, and also that these two isoforms have different functions in neurite formation  
530 although they have high homology (Tables 1 and 2 and Figure 6).

531

532 *JNK specific inhibitor SP600125 rescued the decreased neurite number in Gstp1 and 2 KD*  
533 *primary cortical neurons*

534 A previous study by Wang showed that GSTP1 directly interacts with JNK1 in the mouse  
535 embryonic fibroblast cell line, NIH3T3, and the enzymatic activity of JNK1 is inhibited by its  
536 interaction with GSTP1 (Wang et al., 2001). Also, Cdk5 activity is inhibited by Gstp (Sun et al.,  
537 2011). Previous studies have shown that JNK proteins and Cdk5 play important roles in  
538 neuritogenesis (Eom et al., 2005; Eminel et al., 2008). Therefore, we tested whether the  
539 inhibition of JNK activity can rescue the defects seen in Gstp KD primary cortical neurons. We  
540 applied SP600125, a specific JNK inhibitor which inhibits JNK1, 2, and 3 kinase activity with  
541 similar efficacy, in primary cortical neuron culture (Bennett et al., 2001) (Figure 7). SP600125 or  
542 DMSO (as a control) was added to the culture medium after 1 hour of re-plating before starting  
543 neurite initiation, which happens around 4 hours after re-plating (Dotti et al., 1988; Flynn, 2013).  
544 At 48 hours after re-plating, we fixed the cells and quantified the morphology by analyzing  
545 neurite number, because we have shown a fundamental function of Gstp1 and 2 is to regulate  
546 neurite initiation. Consistent with the Gstp KD neurons *in vitro* and *in vivo* (Figures 2 and 4), the  
547 depletion of Gstp1 and 2 caused a significant reduction of neurite number with DMSO treatment  
548 (Figures 7A and B) (scramble and DMSO (brown bar),  $5.36 \pm 0.2880$ ; KD and DMSO (orange  
549 bar),  $4.28 \pm 0.2347$ , two-way ANOVA with Tukey's multiple comparison,  $F_{(2,144)}=6.566$ , \*

550 P=0.0413). JNK inhibition with SP600125 rescued the defect in neurite number caused by Gstp  
551 knockdown as compared to control neurons (KD and DMSO (orange bar),  $4.28 \pm 0.2347$ ; KD  
552 and SP600125 (green bar),  $5.36 \pm 0.3208$  two-way ANOVA with Tukey's multiple comparison,  
553  $F_{(2,144)}=6.566$ , \* P=0.0413) (Figure 7B). Although the importance of JNK in neurite formation is  
554 well known as described above, the treatment of neurons with  $1\mu\text{M}$  SP600125 in scramble  
555 neurons did not show any defects in neurite number. However, we observed shorter neurite  
556 length in scramble neurons treated with  $1\mu\text{M}$  SP600125, suggesting that  $1\mu\text{M}$  is an effective  
557 concentration to inhibit JNK activity in neurite formation (data not shown). To ensure Gstp's  
558 effects on neurite initiation are specifically through the JNK pathway and not through other  
559 related pathways known to affect neurite formation, we tested whether Cdk5 inhibition could  
560 also rescue these defects. Cdk5 activity is also negatively regulated by Gstp and is related to  
561 neurite formation (Nikolic et al., 1996; Paglini et al., 1998; Sun et al., 2011). The Cdk5 inhibitor  
562 Roscovitine was used to test whether it can also rescue the defects in neurite number in the KD  
563 neurons. By treating neurons transfected with the plasmid coding for scramble or Gstp shRNA  
564 with Roscovitine, we found that Cdk5 inhibition could not rescue the defects in neurite number  
565 in KD neurons (KD and DMSO (orange bar),  $4.28 \pm 0.2347$ ; KD and Roscovitine (red bar),  $436$   
566  $\pm 0.2227$ , two-way ANOVA with Tukey's multiple comparison, ns,  $p>0.99$ ; scramble and  
567 Roscovitine (blue bar),  $5.48 \pm 0.2318$ ; KD and Roscovitine (red bar),  $436 \pm 0.2227$ , two-way  
568 ANOVA with Tukey's multiple comparison, \* P=0.0303; KD and DMSO (orange bar),  $4.28 \pm$   
569  $0.2347$ ; scramble and Roscovitine (blue bar),  $5.48 \pm 0.2318$ , two-way ANOVA with Tukey's  
570 multiple comparison, \* P=0.0158). We also tested a higher concentration ( $5\mu\text{M}$ ) of Roscovitine,  
571 but it still could not rescue the defects (data not shown).

572

573 Thus, the defects in neurite initiation caused by the knockdown of Gstp1 and 2 were rescued by  
574 the inhibition of JNK activity, but not Cdk5, indicating that Gstp proteins regulate neurite  
575 initiation specifically via the JNK signaling pathway.

576

577 **Discussion**

578 In this study, we established that Gstp proteins are essential for neurite formation, particularly  
579 neurite initiation. As far as we know, this is the first study that elucidates the functions of Gstp  
580 proteins in neuritogenesis during cortical development. We showed that both overexpression and  
581 knockdown of the Gstp proteins resulted in defects in neuronal morphology during neurite  
582 formation. Knockdown of Gstp1 and 2 together using shRNA *in vitro* revealed a significant  
583 decrease in neurite number from the soma, indicating the importance of Gstp proteins in neurite  
584 initiation (Figure 2). Sholl analysis showed that neurite branching proximal to the soma was  
585 reduced in KD neurons, which resulted from defects in neurite initiation, whereas at 30 to 55  $\mu\text{m}$   
586 away from the soma, neurite branching was more frequent in KD neurons (Figure 2F). By *in vivo*  
587 KD of Gstp1 and 2, we found an abnormal swelling in the apical dendrite of KD pyramidal  
588 neurons in layer 2/3 at P3, while at P15, the swelling was not seen, indicating the defects were  
589 corrected as neurons matured (Figures 3E and 4G). Similarly, we observed a disrupted angle of  
590 the apical dendrite at P3, which was rectified and not seen at P15. At P15, we observed a reduced  
591 number of basal dendrites in KD pyramidal neurons, which is in chorus with our observations in  
592 primary cortical neurons *in vitro* (Figures 2E and 4B). This indicates that the regulation of  
593 neurite initiation is a primary function of Gstp1 and 2 in the developing cortex. Thus, Gstp1 and  
594 2 are key players in neurite initiation and apical dendrite orientation at the early stage of  
595 neuritogenesis, but some of these deficiencies seem to be compensated for at later developmental  
596 stages. Live imaging at P0 showed that the length of extension of the apical dendrite in KD  
597 neurons was shorter than the control at the beginning of the live imaging, while the KD neurons  
598 increased the length of the apical dendrite after 250 minutes (Figure 5C). Although KD of Gstp1  
599 and 2 did not affect the velocity of growth and retraction in the neurons (Figure 5E), by

600 quantifying the frequency of growth and retraction of neurites, we found that the KD cells  
601 retracted neurites less frequently, indicating that this is the reason why the length of the apical  
602 dendrite caught up to the one of the scramble neurons after 250 minutes of the live imaging  
603 (Figure 5C and F). Also, we found the tip of the apical dendrite was more frequently and  
604 dramatically changing its direction in the KD neurons (Figures 5G-I). Thus, the live imaging  
605 revealed that the initial step of apical dendrite initiation was disrupted by Gstp 1/2 KD.  
606 Overexpression of Gstp 1 or 2 resulted in changes in neurite length, suggesting a role in neurite  
607 elongation (Figure 6). Finally, we found the defects in neurite initiation seen in KD neurons were  
608 rescued by the treatment of KD neurons with JNK inhibitor, SP600125 (Figure 7). This strongly  
609 indicates that the functions of Gstp proteins in neurite initiation are mediated by the JNK  
610 signaling pathway.

611  
612 Humans have only one *GSTP*, *GSTP1*, whereas mice have three isoforms, *Gstp1*, 2 and 3. The  
613 human *GSTP1* gene has high homology to mouse *Gstp1* and 2 with about 83% identity, but less  
614 to mouse *Gstp3* with about 75% identity (Tables 1 and 2). Since both Gstp1 and 2 are highly  
615 homologous to each other and to human GSTP1, we analyzed the function of Gstp1 and 2  
616 together. In this study, we used the shRNA by which Gstp1 and 2, but not Gstp3, were knocked  
617 down at the same time. The efficiency was approximately 85% for Gstp1, and 95% for Gstp2.  
618 Additionally, though there is a report indicating that Gstp is important for cell survival (Tew and  
619 Townsend, 2012), in our study the knockdown in primary neurons did not cause cell death within  
620 5 days after shRNA transfection *in vitro*. Moreover, our *in vivo* experiments indicate that Gstp  
621 KD neurons were not eliminated *in vivo* for 19 days (P15) after IUE at E15.5, suggesting that the

622 results obtained from *Gstp1* and 2 knockdown here were not the secondary effects of an  
623 unhealthy condition.

624  
625 Our analysis of the expression of each *Gstp* isoform during cortical development by using RT-  
626 PCR with the isoform-specific primers revealed that *Gstp1*, but not *Gstp2* or 3, is the major *Gstp*  
627 protein expressed during embryonic cortical development, especially at the early stages (Figure  
628 1E). To identify the specific roles of *Gstp1* and 2 in neurite formation, we adopted the gain-of-  
629 function approach by overexpressing *Gstp1* or 2 in primary cortical neurons (Figure 6). In our  
630 overexpression experiments, *Gstp1* or *Gstp2* overexpression caused different phenotypes in  
631 cortical neurons, suggesting the possibility that they have different roles in neuritogenesis despite  
632 their high similarity. Although humans have one *GSTP*, *GSTP1*, it is informative to clarify the  
633 function of *Gstp1*, 2, and 3 separately, and the information from these analyses will help us  
634 understand the mechanisms of neurite formation regulated by *Gstp* proteins in detail. To further  
635 analyze the functions of each *Gstp* protein, genomic modification by the CRISPR/Cas9  
636 technique would be a useful tool. Also, the knockout mouse of each isoform would be useful to  
637 further test whether *Gstp* is important for neurobehavior. The *Gstp1* and 2 double knockout  
638 mouse line has been created, and analysis of its phenotypes has been performed. An increase of  
639 skin tumorigenesis was observed (Henderson et al., 1998). Although the authors described that  
640 the double knockout mice appeared healthy with no defects in histopathology in major organs, it  
641 is unclear if the brain was analyzed. In addition, another *Gstp* knockout mouse line (*GstpΔ/Δ*)  
642 was created by deleting all three *Gstp* genes (Xiang et al., 2014). In the *GstpΔ/Δ* mice, no defects  
643 in the brain have been described, but it is not clear whether neurite formation was analyzed using  
644 these mice. Based on our observations and discussion here about the possibility that *Gstp1* and 2

645 have different functions in neurite morphogenesis, the creation of the *Gstp1* and *Gstp2* single-  
646 gene knockout mice would be beneficial for understanding their functions in more detail.

647

648 *In vivo* knockdown of *Gstp1* and 2 in layer 2/3 pyramidal neurons showed disrupted morphology  
649 at P0, P3, and P15 (Figures 3-5). At P0, when we were performing live imaging, we observed a  
650 disrupted angle in the apical dendrite of the KD neurons, while at P15, the angle became normal.

651 Also, at P3, we saw an abnormal swelling at the stalk region of the apical dendrite of knockdown  
652 neurons, but this phenotype was not seen at P15. Thus, during cortical development, the swelling

653 of the apical dendrite and its orientation defects were normalized. This could be a result of a

654 compensatory effect by another *Gstp*, *Gstp3*. In RT-PCR, we saw that the expression of *Gstp3* in

655 the cortex starts later during cortical development and becomes higher at the neonatal stage

656 (Figure 1E). Therefore, *Gstp3* could compensate for *Gstp1* and 2 depletion, resulting in

657 alleviated phenotypes. In addition to the intrinsic compensation by *Gstp3*, exogenic

658 compensation such as guidance cues and cell-cell interactions could help correct the defects,

659 especially in orientation. This possibility is supported by the observation in our live imaging. In

660 live imaging, the tip of the apical dendrite in KD neurons changed more frequently, like the tip

661 was exploring the right direction.

662

663 As mentioned above, an interesting phenomenon found in our live imaging data is that the apical

664 dendritic tips of the KD cells turned more than the control neurons, in terms of the frequency and

665 the angle of turning (Figures 5G-I). It appeared as if the KD tips were exploring which path to

666 go, while the normal tips were straight forward to one direction (Figures 3B and 5G-L). The

667 growth of the neurite tip relies on the growth cone localized at the leading edge of the neurite.



668 The receptors on the growth cone can receive guidance cues and transfer the signals inside the  
669 growth cone. In the movement of growth cones, F-actin and microtubules play essential roles,  
670 and the microtubules move into the filopodia along with the F-actin bundles. Then, more  
671 microtubules invade into the filopodia to extend. In contrast, filopodia that are not invaded by  
672 microtubules will be retracted (Lowery and Van Vactor, 2009). In our recording, the tip of KD  
673 neurons would pursue one direction at one-time point, then retract the filopodia, and extend other  
674 filopodia at another region of the growth cone, and this process would repeat again and again.  
675 Based on our observations, there could be some defects in the coupling of F-actin and  
676 microtubules occurring in the KD cells, where the stabilization of the filopodia is compromised.  
677 A previous study showed that this coupling process is largely dependent on microtubule plus-end  
678 complexes, F-actin retrograde flow, and the gradient of microtubule stabilizers and destabilizers  
679 (Rodriguez et al., 2003; Cammarata et al., 2016). It is consistent with our observations since the  
680 microtubule plus-end complexes (+TIPs), as well as the stabilizer and destabilizers, are heavily  
681 regulated by kinases, such as JNK. For example, the motor protein kinesin requires the binding  
682 of active JNK to regulate microtubule dynamics and +TIP CLIP-170 rescuing activity (Daire et  
683 al., 2009; Cammarata et al., 2016; Kawasaki et al., 2018). To further study the cellular  
684 mechanism, the markers of microtubule plus-end and F-actin can be used in live-imaging to  
685 visualize how these behave in the growth cone of the KD neurons.

686

687 Although the swollen apical dendrite recovered at P15, the increased width at the proximal  
688 region of apical dendrite was observed at P3 (Figures 3C-E). Swelling at the proximal region of  
689 the apical dendrite could be linked to the excess of the trafficking of intracellular organelles from  
690 soma. For example, the Golgi apparatus has been shown to accumulate at the base of the apical

691 dendrite, and mitochondria are also trafficked towards the dendrites (Wu et al., 2015). It is  
692 possible that in the knockdown neurons, excessive organelles accumulate at the base of apical  
693 dendrites because effective outward organelle trafficking towards the distal area of the dendrite  
694 is prevented. These possibilities could be addressed by time-lapse live imaging using organelles'  
695 markers.

696  
697 In the present study, we also explored the potential involvement of JNK and Cdk5 in the Gstp  
698 signaling pathway in neuritogenesis by using JNK and Cdk5 inhibitors, because JNK and Cdk5  
699 kinase activities are inhibited by GSTP1 (Figure 7) (Wang et al., 2001; Eminel et al., 2008; Sun  
700 et al., 2011). We conducted experiments with JNK inhibitor SP600125 and found that the  
701 treatment of Gstp KD neurons with SP600125 rescued the neurite initiation defects caused by  
702 Gstp1 and 2 knockdown. Applying Cdk5 inhibitor Roscovitine, however, did not rescue the  
703 decreased neurite number. Thus, the results suggest that the functions of Gstp in neurite  
704 formation are specifically mediated through the JNK pathway. Previous study showed that  
705 neurons with JNK2 and JNK3 knockout had defect in neurite initiation after 24 hours of culture,  
706 indicating that JNK2 and JNK3 are important for neurite initiation, but not JNK1 (Barnat et al.,  
707 2010). Given that our shRNA knocks down Gstp1 and 2, Gstp1 and 2 would regulate neurite  
708 initiation through JNK2 and 3. To further study the molecular mechanism, a JNK specific  
709 knockdown approach could be used in combination with Gstp knockdown. Meanwhile, the  
710 further exploration of the downstream targets of JNK by comparing the phosphorylation status of  
711 the targets between control and KD neurons could help understand the Gstp/JNK signaling  
712 pathway in neuritogenesis in more detail.

## 713 **References**

- 714 Aaker JD, Elbaz B, Wu Y, Looney TJ, Zhang L, Lahn BT, Popko B (2016) Transcriptional  
715 Fingerprint of Hypomyelination in Zfp191null and Shiverer (Mbpshi) Mice. *ASN neuro*  
716 8:1759091416670749.
- 717 Adler V, Yin Z, Fuchs SY, Benezra M, Rosario L, Tew KD, Pincus MR, Sardana M, Henderson  
718 CJ, Wolf CR, Davis RJ, Ronai Z (1999) Regulation of JNK signaling by GSTp. *EMBO J*  
719 18:1321-1334.
- 720 Bakos J, Bacova Z, Grant SG, Castejon AM, Ostatnikova D (2015) Are Molecules Involved in  
721 Neuritogenesis and Axon Guidance Related to Autism Pathogenesis? *NeuroMolecular*  
722 *Medicine* 17:297-304.
- 723 Barnat M, Enslin H, Propst F, Davis RJ, Soares S, Nothias F (2010) Distinct roles of c-Jun N-  
724 terminal kinase isoforms in neurite initiation and elongation during axonal regeneration. *J*  
725 *Neurosci* 30:7804-7816.
- 726 Bennett BL, Sasaki DT, Murray BW, O'Leary EC, Sakata ST, Xu W, Leisten JC, Motiwala A,  
727 Pierce S, Satoh Y, Bhagwat SS, Manning AM, Anderson DW (2001) SP600125, an  
728 anthrapyrazolone inhibitor of Jun N-terminal kinase. *Proc Natl Acad Sci U S A*  
729 98:13681-13686.
- 730 Bennison SA, Blazejewski SM, Smith TH, Toyo-Oka K (2020) Protein kinases: master  
731 regulators of neuritogenesis and therapeutic targets for axon regeneration. *Cell Mol Life*  
732 *Sci* 77:1511-1530.
- 733 Cammarata GM, Bearce EA, Lowery LA (2016) Cytoskeletal social networking in the growth  
734 cone: How +TIPs mediate microtubule-actin cross-linking to drive axon outgrowth and  
735 guidance. *Cytoskeleton (Hoboken)* 73:461-476.
- 736 Cornell B, Wachi T, Zhukarev V, Toyo-Oka K (2016) Regulation of neuronal morphogenesis by  
737 14-3-3epsilon (Ywhae) via the microtubule binding protein, doublecortin. *Hum Mol*  
738 *Genet* 25:4405-4418.
- 739 Daire V, Giustiniani J, Leroy-Gori I, Quesnoit M, Drevensek S, Dimitrov A, Perez F, Pous C  
740 (2009) Kinesin-1 regulates microtubule dynamics via a c-Jun N-terminal kinase-  
741 dependent mechanism. *J Biol Chem* 284:31992-32001.
- 742 Darrow SM, Grados M, Sandor P, Hirschtritt ME, Illmann C, Osiecki L, Dion Y, King R, Pauls  
743 D, Budman CL, Cath DC, Greenberg E, Lyon GJ, McMahon WM, Lee PC, Delucchi KL,  
744 Scharf JM, Mathews CA (2017) Autism Spectrum Symptoms in a Tourette's Disorder  
745 Sample. *J Am Acad Child Adolesc Psychiatry* 56:610-617.e611.
- 746 Diez-Roux G et al. (2011) A high-resolution anatomical atlas of the transcriptome in the mouse  
747 embryo. *PLoS Biol* 9:e1000582.
- 748 Dotti CG, Sullivan CA, Banker GA (1988) The establishment of polarity by hippocampal  
749 neurons in culture. *J Neurosci* 8:1454-1468.
- 750 Drubin DG, Feinstein SC, Shooter EM, Kirschner MW (1985) Nerve growth factor-induced  
751 neurite outgrowth in PC12 cells involves the coordinate induction of microtubule  
752 assembly and assembly-promoting factors. *J Cell Biol* 101:1799-1807.
- 753 Eminel S, Roemer L, Waetzig V, Herdegen T (2008) c-Jun N-terminal kinases trigger both  
754 degeneration and neurite outgrowth in primary hippocampal and cortical neurons. *J*  
755 *Neurochem* 104:957-969.
- 756 Eom D-S, Choi W-S, Ji S, Cho JW, Oh YJ (2005) Activation of c-Jun N-terminal kinase is  
757 required for neurite outgrowth of dopaminergic neuronal cells. *NeuroReport* 16:823-828.

- 758 Flynn KC (2013) The cytoskeleton and neurite initiation. *Bioarchitecture* 3:86-109.
- 759 Goto S, Kawakatsu M, Izumi S, Urata Y, Kageyama K, Ihara Y, Koji T, Kondo T (2009)  
760 Glutathione S-transferase pi localizes in mitochondria and protects against oxidative  
761 stress. *Free Radic Biol Med* 46:1392-1403.
- 762 Gupta S, Barrett T, Whitmarsh AJ, Cavanagh J, Sluss HK, Dérijard B, Davis RJ (1996) Selective  
763 interaction of JNK protein kinase isoforms with transcription factors. *EMBO J* 15:2760-  
764 2770.
- 765 Hand R, Polleux F (2011) Neurogenin2 regulates the initial axon guidance of cortical pyramidal  
766 neurons projecting medially to the corpus callosum. *Neural Dev* 6:30.
- 767 Harrill JA, Freudenrich TM, Machacek DW, Stice SL, Mundy WR (2010) Quantitative  
768 assessment of neurite outgrowth in human embryonic stem cell-derived hN2™ cells  
769 using automated high-content image analysis. *NeuroToxicology* 31:277-290.
- 770 Henderson CJ, McLaren AW, Moffat GJ, Bacon EJ, Wolf CR (1998) Pi-class glutathione S-  
771 transferase: regulation and function. *Chem Biol Interact* 111-112:69-82.
- 772 Kawasaki A, Okada M, Tamada A, Okuda S, Nozumi M, Ito Y, Kobayashi D, Yamasaki T,  
773 Yokoyama R, Shibata T, Nishina H, Yoshida Y, Fujii Y, Takeuchi K, Igarashi M (2018)  
774 Growth Cone Phosphoproteomics Reveals that GAP-43 Phosphorylated by JNK Is a  
775 Marker of Axon Growth and Regeneration. *iScience* 4:190-203.
- 776 Knight TR, Choudhuri S, Klaassen CD (2007) Constitutive mRNA Expression of Various  
777 Glutathione S-Transferase Isoforms in Different Tissues of Mice. *Toxicol Sci* 100:513-  
778 524.
- 779 Komulainen E, Zdrojewska J, Freemantle E, Mohammad H, Kuleskaya N, Deshpande P,  
780 Marchisella F, Mysore R, Hollos P, Michelsen KA, Magard M, Rauvala H, James P,  
781 Coffey ET (2014) JNK1 controls dendritic field size in L2/3 and L5 of the motor cortex,  
782 constrains soma size, and influences fine motor coordination. *Front Cell Neurosci* 8:272.
- 783 Lowery LA, Van Vactor D (2009) The trip of the tip: understanding the growth cone machinery.  
784 *Nat Rev Mol Cell Biol* 10:332-343.
- 785 Mannervik B, Alin P, Guthenberg C, Jansson H, Tahir MK, Warholm M, Jornvall H (1985)  
786 Identification of three classes of cytosolic glutathione transferase common to several  
787 mammalian species: correlation between structural data and enzymatic properties. *Proc*  
788 *Natl Acad Sci U S A* 82:7202-7206.
- 789 Monaco R, Friedman FK, Hyde MJ, Chen JM, Manolatus S, Adler V, Ronai Z, Koslosky W,  
790 Pincus MR (1999) Identification of a Glutathione-S-Transferase Effector Domain for  
791 Inhibition of jun Kinase, by Molecular Dynamics. *J Protein Chem* 18:859-866.
- 792 Nikolic M, Dudek H, Kwon YT, Ramos YF, Tsai LH (1996) The cdk5/p35 kinase is essential for  
793 neurite outgrowth during neuronal differentiation. *Genes Dev* 10:816-825.
- 794 Paglini G, Pigino G, Kunda P, Morfini G, Maccioni R, Quiroga S, Ferreira A, Caceres A (1998)  
795 Evidence for the participation of the neuron-specific CDK5 activator P35 during laminin-  
796 enhanced axonal growth. *J Neurosci* 18:9858-9869.
- 797 Perron JC, Bixby JL (1999) Distinct Neurite Outgrowth Signaling Pathways Converge on ERK  
798 Activation. *Mol Cell Neurosci* 13:362-378.
- 799 Pischedda F, Montani C, Obergasteiger J, Frapporti G, Corti C, Rosato Siri M, Volta M, Piccoli  
800 G (2018) Cryopreservation of Primary Mouse Neurons: The Benefit of Neurostore  
801 Cryoprotective Medium. *Front Cell Neurosci* 12:81.
- 802 Reese D, Drapeau P (1998) Neurite growth patterns leading to functional synapses in an  
803 identified embryonic neuron. *J Neurosci* 18:5652-5662.

- 804 Rodriguez OC, Schaefer AW, Mandato CA, Forscher P, Bement WM, Waterman-Storer CM  
805 (2003) Conserved microtubule-actin interactions in cell movement and morphogenesis.  
806 *Nat Cell Biol* 5:599-609.
- 807 Schaefer AW, Schoonderwoert VTG, Ji L, Mederios N, Danuser G, Forscher P (2008)  
808 Coordination of actin filament and microtubule dynamics during neurite outgrowth. *Dev*  
809 *Cell* 15:146-162.
- 810 Seow KH, Zhou L, Stephanopoulos G, Too H-P (2013) c-Jun N-terminal kinase in synergistic  
811 neurite outgrowth in PC12 cells mediated through P90RSK. *BMC Neurosci* 14:153.
- 812 Shen C-P, Chou IC, Liu H-P, Lee C-C, Tsai Y, Wu B-T, Hsu B-D, Lin W-Y, Tsai F-J (2014)  
813 Association of glutathione S-transferase P1 (GSTP1) polymorphism with Tourette  
814 syndrome in Taiwanese patients. *Genet Test Mol Biomarkers* 18:41-44.
- 815 Shen H-M, Liu Z-g (2006) JNK signaling pathway is a key modulator in cell death mediated by  
816 reactive oxygen and nitrogen species. *Free Radic Biol Med* 40:928-939.
- 817 Sun K-H, Chang K-H, Clawson S, Ghosh S, Mirzaei H, Regnier F, Shah K (2011) Glutathione-  
818 S-transferase P1 is a critical regulator of Cdk5 kinase activity. *J Neurochem* 118:902-914.
- 819 Taniguchi Y, Young-Pearse T, Sawa A, Kamiya A (2012) In utero electroporation as a tool for  
820 genetic manipulation in vivo to study psychiatric disorders: from genes to circuits and  
821 behaviors. *Neuroscientist* 18:169-179.
- 822 Tew KD, Townsend DM (2012) Glutathione-s-transferases as determinants of cell survival and  
823 death. *Antioxid Redox Signal* 17:1728-1737.
- 824 Thévenin AF, Zony CL, Bahnson BJ, Colman RF (2011) GST pi modulates JNK activity  
825 through a direct interaction with JNK substrate, ATF2. *Protein Sci* 20:834-848.
- 826 Toyo-oka K, Wachi T, Hunt RF, Baraban SC, Taya S, Ramshaw H, Kaibuchi K, Schwarz QP,  
827 Lopez AF, Wynshaw-Boris A (2014) 14-3-3 $\epsilon$  and  $\zeta$  regulate neurogenesis and  
828 differentiation of neuronal progenitor cells in the developing brain. *J Neurosci* 34:12168-  
829 12181.
- 830 Visel A, Thaller C, Eichele G (2004) GenePaint.org: an atlas of gene expression patterns in the  
831 mouse embryo. *Nucleic Acids Res* 32:D552-D556.
- 832 Wang T, Arifoglu P, Ronai Z, Tew KD (2001) Glutathione S-transferase P1-1 (GSTP1-1)  
833 inhibits c-Jun N-terminal kinase (JNK1) signaling through interaction with the C  
834 terminus. *J Biol Chem* 276:20999-21003.
- 835 Won H, Mah W, Kim E, Kim J-W, Hahm E-K, Kim M-H, Cho S, Kim J, Jang H, Cho S-C, Kim  
836 B-N, Shin M-S, Seo J, Jeong J, Choi S-Y, Kim D, Kang C, Kim E (2011) GIT1 is  
837 associated with ADHD in humans and ADHD-like behaviors in mice. *Nat Med* 17:566-  
838 572.
- 839 Wu YK, Fujishima K, Kengaku M (2015) Differentiation of Apical and Basal Dendrites in  
840 Pyramidal Cells and Granule Cells in Dissociated Hippocampal Cultures. *PLOS ONE*  
841 10:e0118482.
- 842 Xiang Z, Snouwaert JN, Kovarova M, Nguyen M, Repenning PW, Latour AM, Cyphert JM,  
843 Koller BH (2014) Mice lacking three Loci encoding 14 glutathione transferase genes: a  
844 novel tool for assigning function to the GSTP, GSTM, and GSTT families. *Drug Metab*  
845 *Dispos* 42:1074-1083.
- 846 Yamauchi J, Miyamoto Y, Sanbe A, Tanoue A (2006) JNK phosphorylation of paxillin, acting  
847 through the Rac1 and Cdc42 signaling cascade, mediates neurite extension in N1E-115  
848 cells. *Exp Cell Res* 312:2954-2961.

849 Zhang J, Grek C, Ye Z-W, Manevich Y, Tew KD, Townsend DM (2014) Pleiotropic functions of  
850 glutathione S-transferase P. *Adv Cancer Res* 122:143-175.  
851

852 **Figure legends**

853 **Figure 1. Gstp proteins strongly express inside the soma of mouse cortical neurons during**  
854 **cortical development. A.** GSTP1 antibody recognizes all three mouse Gstp proteins, Gstp1, 2,  
855 and 3. **B.** Gstp proteins express in the developing cortex at E13.5, E15.5, E17.5, and P0. **C.**  
856 Quantification of western blot data of Gstp expression in the developing cortex normalized to  
857 GAPDH. **D.** Design of the specific primer sets for each *Gstp* gene. RT-PCR revealed that the  
858 specific primer set for *Gstp1*, *Gstp2* and *Gstp3* specifically amplified the *Gstp1*, *Gstp2* and  
859 *Gstp3*. **E.** mRNA expression of each Gstp mRNA in the developing cortex at E15, E18, P0, P5,  
860 and P15. **F-I.** Top photos: Immunostaining of Gstp proteins in primary differentiating cortical  
861 neurons. Non-polarized primary cortical neuron (0 hr after plating on a dish, F), Early neurite  
862 initiation stage (4 hrs, G), Late neurite initiation stage (6 hrs, H) and Neurite extension stage (2  
863 days, I). Arrows from label “i” to “ii” indicate the regions where the signal intensity was  
864 measured. Bottom graphs: Quantification of the signal intensity of DAPI and Gstp crossing the  
865 soma from i to ii. Gstp proteins express both in the cytoplasm and the nucleus. Scale bar, 10  $\mu\text{m}$ .  
866 **J and K.** Immunohistochemical analysis about the expression of Gstp protein in the developing  
867 cortex at P3 (J) and P15 (K). Left panels: low magnification, Right panels: high magnification.  
868 Gstp proteins strongly express in the soma and weakly in the proximal part of dendrites. Scale  
869 bar, 100  $\mu\text{m}$ .

870

871 **Figure 2. Knocking down of Gstp1 and 2 resulted in morphological defects in mouse**  
872 **primary cortical neurons. A.** The plasmids encoding scramble or Gstp shRNA and FLAG-  
873 tagged Gstp1, 2 or 3 were co-transfected into HEK-293 cells. After 48 hours, knockdown  
874 efficiency of shRNA was evaluated by the WB using anti-FLAG antibody. shRNA can knock



875 down both Gstp1 and 2 at the same time, but not Gstp3. **B.** Knockdown validation of Gstp  
876 shRNA in the endogenous Gstp expression in N-2a cells with anti-GSTP1 antibody. Note that  
877 the KD efficiency by Gstp shRNA was 41%. **C.** The analysis of the expression of Gstp1, 2 and 3  
878 in N-2a cells by RT-PCR. N-2a cells express Gstp1 and 3, but not Gstp2. In N-2a cells Gstp1 and 3  
879 were expressed, but not gstp2. **D.** Representative photos of primary cortical neurons transfected  
880 with the plasmid coding scramble or Gstp shRNA, which also codes for Venus fluorescent  
881 protein. Scale bar, 50  $\mu\text{m}$ . **E.** Quantification of the number of neurites from the soma in scramble  
882 and KD group. There is a significant reduction in the number of neurites in the KD group  
883 compared to the scramble group. N=25 per group, unpaired t-test, \*\*\*\* P<0.0001. **F.** Neurite  
884 count distribution of scramble and KD neurons. Most scramble neurons have 5-6 neurites, while  
885 KD neurons have 4. **G.** Quantification of the length of the longest neurite in scramble and KD  
886 neurons. There is no significant difference between them. **H.** Quantification of the length of  
887 shorter neurites in scramble and KD neurons. There is no significant difference between them. **I.**  
888 Sholl analysis showing the branching pattern of the scramble and KD neurons. There is a  
889 difference on the number of branches at 10 and 15  $\mu\text{m}$  away from soma as well as 35 to 50  $\mu\text{m}$   
890 away from the soma. N=25 per group, unpaired t-test, \* P<0.05, \*\* P<0.01.

891  
892 **Figure 3. *In vivo* knockdown of Gstp1 and 2 using shRNA caused morphological defects in**  
893 **pyramidal neurons in layers 2/3 of the cerebral cortex at P3.** **A.** Embryonic cortical neurons  
894 were electroporated with the plasmid coding for scramble or Gstp shRNA at E15.5 using *in utero*  
895 electroporation, and then the brain samples were analyzed at P3. Upper panel: *In utero*  
896 electroporation at E15.5 marked pyramidal neurons in layers 2/3 of the cortex. Brn2 is a marker  
897 for layers 2/3 and 5. Lower panels: Representative photos of Venus-positive pyramidal neurons



898 electroporated with the plasmids coding for scramble shRNA (left panel) and Gstp shRNA (right  
899 panel). Scale bar 100  $\mu\text{m}$  for the upper panels, scale bar 50  $\mu\text{m}$  for the lower panels. **B.**  
900 Quantification of the angle of the apical dendrite in the scramble and KD neurons. Gstp KD  
901 caused significant increase of the angle of the apical dendrite. N=35 per group, unpaired t-test, \*  
902  $P < 0.05$ . **C.** Quantification of the width of the apical dendrite. There is significant increase in the  
903 width of apical dendrite in KD neurons compared to scramble neurons. N=25 per group,  
904 unpaired t-test, \*\*\*  $P < 0.001$ . **D.** Quantification of the width of the soma in control and KD  
905 neurons. There is no significant difference between them. **E.** The ratio of the width between the  
906 apical dendrite and the soma. There is significant increase in the ratio in KD neurons compared  
907 to scramble neurons. N=25 per group, unpaired t-test, \*\*\*\*  $P < 0.0001$ . **F.** Quantification of the  
908 length of the apical dendrite in scramble and KD neurons. There is a tendency to the decrease of  
909 the length in KD neurons, but no significant difference in the length of apical dendrite in KD  
910 neurons compared to control ones. N=25 per group.

911  
912 **Figure 4. *In vivo* knockdown of Gstp1 and 2 using shRNA resulted in defects in neurite**  
913 **initiation at P15. A.** Embryonic cortical neurons were electroporated with the plasmid encoding  
914 scramble or Gstp shRNA at E15.5 using *in utero* electroporation, and then brain samples were  
915 analyzed at P3. Upper panel: *In utero* electroporation at E15.5 marked pyramidal neurons in  
916 layers 2/3 of the cortex. Brn2 is a marker for layers 2/3 and 5. Lower panels: Representative  
917 photos of Venus-positive pyramidal neurons electroporated with the plasmids coding for  
918 scramble shRNA (left panel) and Gstp shRNA (right panel). Scale bar, 100  $\mu\text{m}$ . **B.** Quantification  
919 of the number of neurites from the soma. The axon was excluded from the quantification. There  
920 is a significant reduction of the number of neurites in the KD neurons compared to the control

921 neurons. N=25 per group, unpaired t-test. \*\* P<0.01. **C.** Quantification of the length of the apical  
922 dendrite in control and KD neurons. There is no difference in the length of the apical dendrite. **D.**  
923 Quantification of the total length of the dendrites. There is no difference in the total dendritic  
924 length. N=25 per group. **E.** Quantification of the width of the apical dendrite in the control and  
925 KD neurons. There is no difference in the dendritic width. N=25 per group. **F.** Quantification of  
926 the width of the soma in the control and KD neurons. There is no difference in the soma width.  
927 N=25 per group. **G.** Quantification of the ratio of the apical dendritic width vs. soma. There is no  
928 difference in the ratio between control and KD neurons. **H.** Sholl analysis showing the branching  
929 pattern of the control and KD neurons. There is a significant difference in branching at 20  $\mu\text{m}$   
930 and 30  $\mu\text{m}$  away from the center of the soma. \* P<0.05, N=25 per group.

931  
932 **Figure 5. *Ex vivo* time-lapse live imaging at P0 showed defects in neurite orientation and**  
933 **dynamic movement of neurites in KD neurons. A.** Cortical pyramidal neurons in the layers 2/3  
934 were marked by electroporating with the plasmid coding scramble or KD shRNA at E15.5 using  
935 *in utero* electroporation, and then brain samples were analyzed at P0 by performing time-lapse  
936 live imaging on brain slices for a total period of 600 minutes with 10 minutes interval. **B.**  
937 Montage of the representative neurons electroporated with the plasmids coding for scramble or  
938 Gstp KD shRNA. **C** Normalized neurite length over time. The length of the neurite at each time  
939 point was measured for a time course of 600 minutes and normalized by subtracting the initial  
940 length of each neuron. N=10 per group. Scale bar, 20  $\mu\text{m}$ . **D.** Measurement of growing or  
941 retracting velocity of neurite formation in scramble and KD neurons. **E.** Quantification of the  
942 average velocity of growth and retraction in the scramble and KD neurons. There is no  
943 significant difference in the neurite formation velocity in the scramble and KD group. **F.**

944 Quantification of the frequency of growth and retraction in scramble and KD neurons. Note that  
945 there is no difference in the frequency of growth between scramble and KD group, but a  
946 significant difference in the frequency of retraction. N=10 per group, \* P<0.05. **G.** Schematic of  
947 the measurement of tip turning. **H.** Quantification of the frequency of turning of the apical  
948 dendrite tip in the scramble and KD neurons. Apical dendritic tip of KD neurons turned more  
949 frequently than the scramble neurons. N=10 per group, \*\* P<0.01. **I.** Quantification of the angle  
950 per tip turning. The KD neurons made larger turning compared to the scramble neurons. N=10  
951 per group, \* P<0.05. **J.** Schematic of the measurement of the initial angle of the apical dendrite  
952 from the soma. **K.** Quantification of angle from the soma in the scramble and KD neurons at  
953 time point 0. N=20 per group, \*\* P<0.01. **L.** The change in angle of the apical dendrite over the  
954 time course of 600 minutes. N=10 per group.

955

956 **Figure 6. Overexpression of Gstp1 or 2 in primary cortical neurons suggests different**  
957 **functions in neurite formation. A.** Representative photos of primary cortical neurons  
958 transfected with YFP alone (control), Gstp1 + YFP, or Gstp2 + YFP. Scale bar, 100  $\mu$ m. **B.**  
959 Quantification of the total neurite length. One-way ANOVA suggests there was significant  
960 difference in the There is a significant reduction of total neurite length between the control and  
961 the Gstp1 OE groups. There is no significant difference between the control and Gstp2 OE  
962 groups. N=25 per group, one-way ANOVA for Tukey's multiple comparison,  $F_{(2,72)}=15.07$ , \*\*\*\*  
963  $P<0.0001$ . **C.** Quantification of the sum of the shorter neurites' length in control, Gstp1 OE, and  
964 Gstp2 OE neurons. There is a significant decrease between the control and the Gstp1 OE group.  
965 N=25 per group, one-way ANOVA for Tukey's multiple comparison,  $F_{(2,72)}=18.01$ , \*\*\*  $P<0.001$ .  
966 **D.** Quantification of the longest neurite's length in control, Gstp1 OE, and Gstp2 OE neurons.

967 No statistical significance was found. N=25 per group, one-way ANOVA for Tukey's multiple  
968 comparison,  $F_{(2,72)}=3.18$ . **E.** Quantification of the number of neurites from the soma. No  
969 significant difference was detected among the control, Gstp1 OE nor Gstp2 OE groups. N=25 per  
970 group, one-way ANOVA for Tukey's multiple comparison,  $F_{(2,72)}=0.6544$ , ns,  $p>0.05$ . **F.** Sholl  
971 analysis for quantifying branching pattern. Gstp1 OE neurons have fewer branches at 20 to 45  
972  $\mu\text{m}$  away from the soma. N=25 per group, one-way ANOVA for Tukey's multiple comparison, \*  
973  $P<0.05$ , \*\*  $P<0.01$ , \*\*\*\*  $P<0.0001$ .

974  
975 **Figure 7. JNK inhibitor SP600125 rescued the defect in neurite initiation caused by Gstp1**  
976 **and 2 knockdown. A.** Representative photos of scramble or KD primary cortical neurons treated  
977 with vehicle, 1  $\mu\text{M}$  of SP600125, JNK inhibitor, or 2  $\mu\text{M}$  of Roscovitine, Cdk5 inhibitor. Scale  
978 bar, 20  $\mu\text{m}$ . **B.** Quantification of the number of neurites from some in the scramble or KD  
979 neurons with or without the treatment of SP600125 or Roscovitine. The neurite number in KD  
980 neurons was rescued by the treatment of SP600125, but not Roscovitine. Two-way ANOVA  
981 determined that there was a statistical significance among the groups, N=25 per group,  
982  $F_{(2,144)}=6.566$ ,\*  $P<0.05$ .

983

|              |                                             | <i>Gstp1</i> | <i>Gstp2</i> | <i>Gstp3</i> | <i>GSTP1</i> |
|--------------|---------------------------------------------|--------------|--------------|--------------|--------------|
| <b>Human</b> | <b><i>GSTP1</i>(633 nt)<br/>NM_000852.3</b> | 83.25        | 82.46        | 75.2         | 100          |
| <b>Mouse</b> | <b><i>Gstp1</i>(633 nt)<br/>NM_013541.1</b> | 100          | 98.1         | 71.56        | 83.25        |
|              | <b><i>Gstp2</i>(633 nt)<br/>NM_181796.2</b> | 98.1         | 100          | 71.56        | 82.46        |
|              | <b><i>Gstp3</i>(633 nt)<br/>NM_144869.3</b> | 71.56        | 71.56        | 100          | 75.2         |

984 Table 1. Homology of cDNA sequence among mouse *Gstp1*, 2 and 3 and human *GSTP1*

985

|              |                                                      | <b>GSTP1</b> | <b>Gstp1</b> | <b>Gstp2</b> | <b>Gstp3</b><br><b>isoform 1</b> | <b>Gstp3</b><br><b>isoform 2</b> |
|--------------|------------------------------------------------------|--------------|--------------|--------------|----------------------------------|----------------------------------|
| <b>Human</b> | <b>GSTP1 (210 aa)</b><br><b>CAG29357.1</b>           | 100          | 85.24        | 83.81        | 70.48                            | 69.95                            |
| <b>Mouse</b> | <b>Gstp1 (210 aa)</b><br><b>NP_038569.1</b>          | 85.24        | 100          | 97.14        | 70.00                            | 68.39                            |
|              | <b>Gstp2 (210 aa)</b><br><b>NP_861461.1</b>          | 83.81        | 97.14        | 100          | 70.48                            | 68.91                            |
|              | <b>Gstp3 isoform1 (210 aa)</b><br><b>NP_659118.1</b> | 70.48        | 70           | 70.48        | 100                              | 100                              |

986 Table 2. Homology of amino acid sequence among mouse Gstp1, 2 and 3 and human GSTP1.

987

# Figure 1

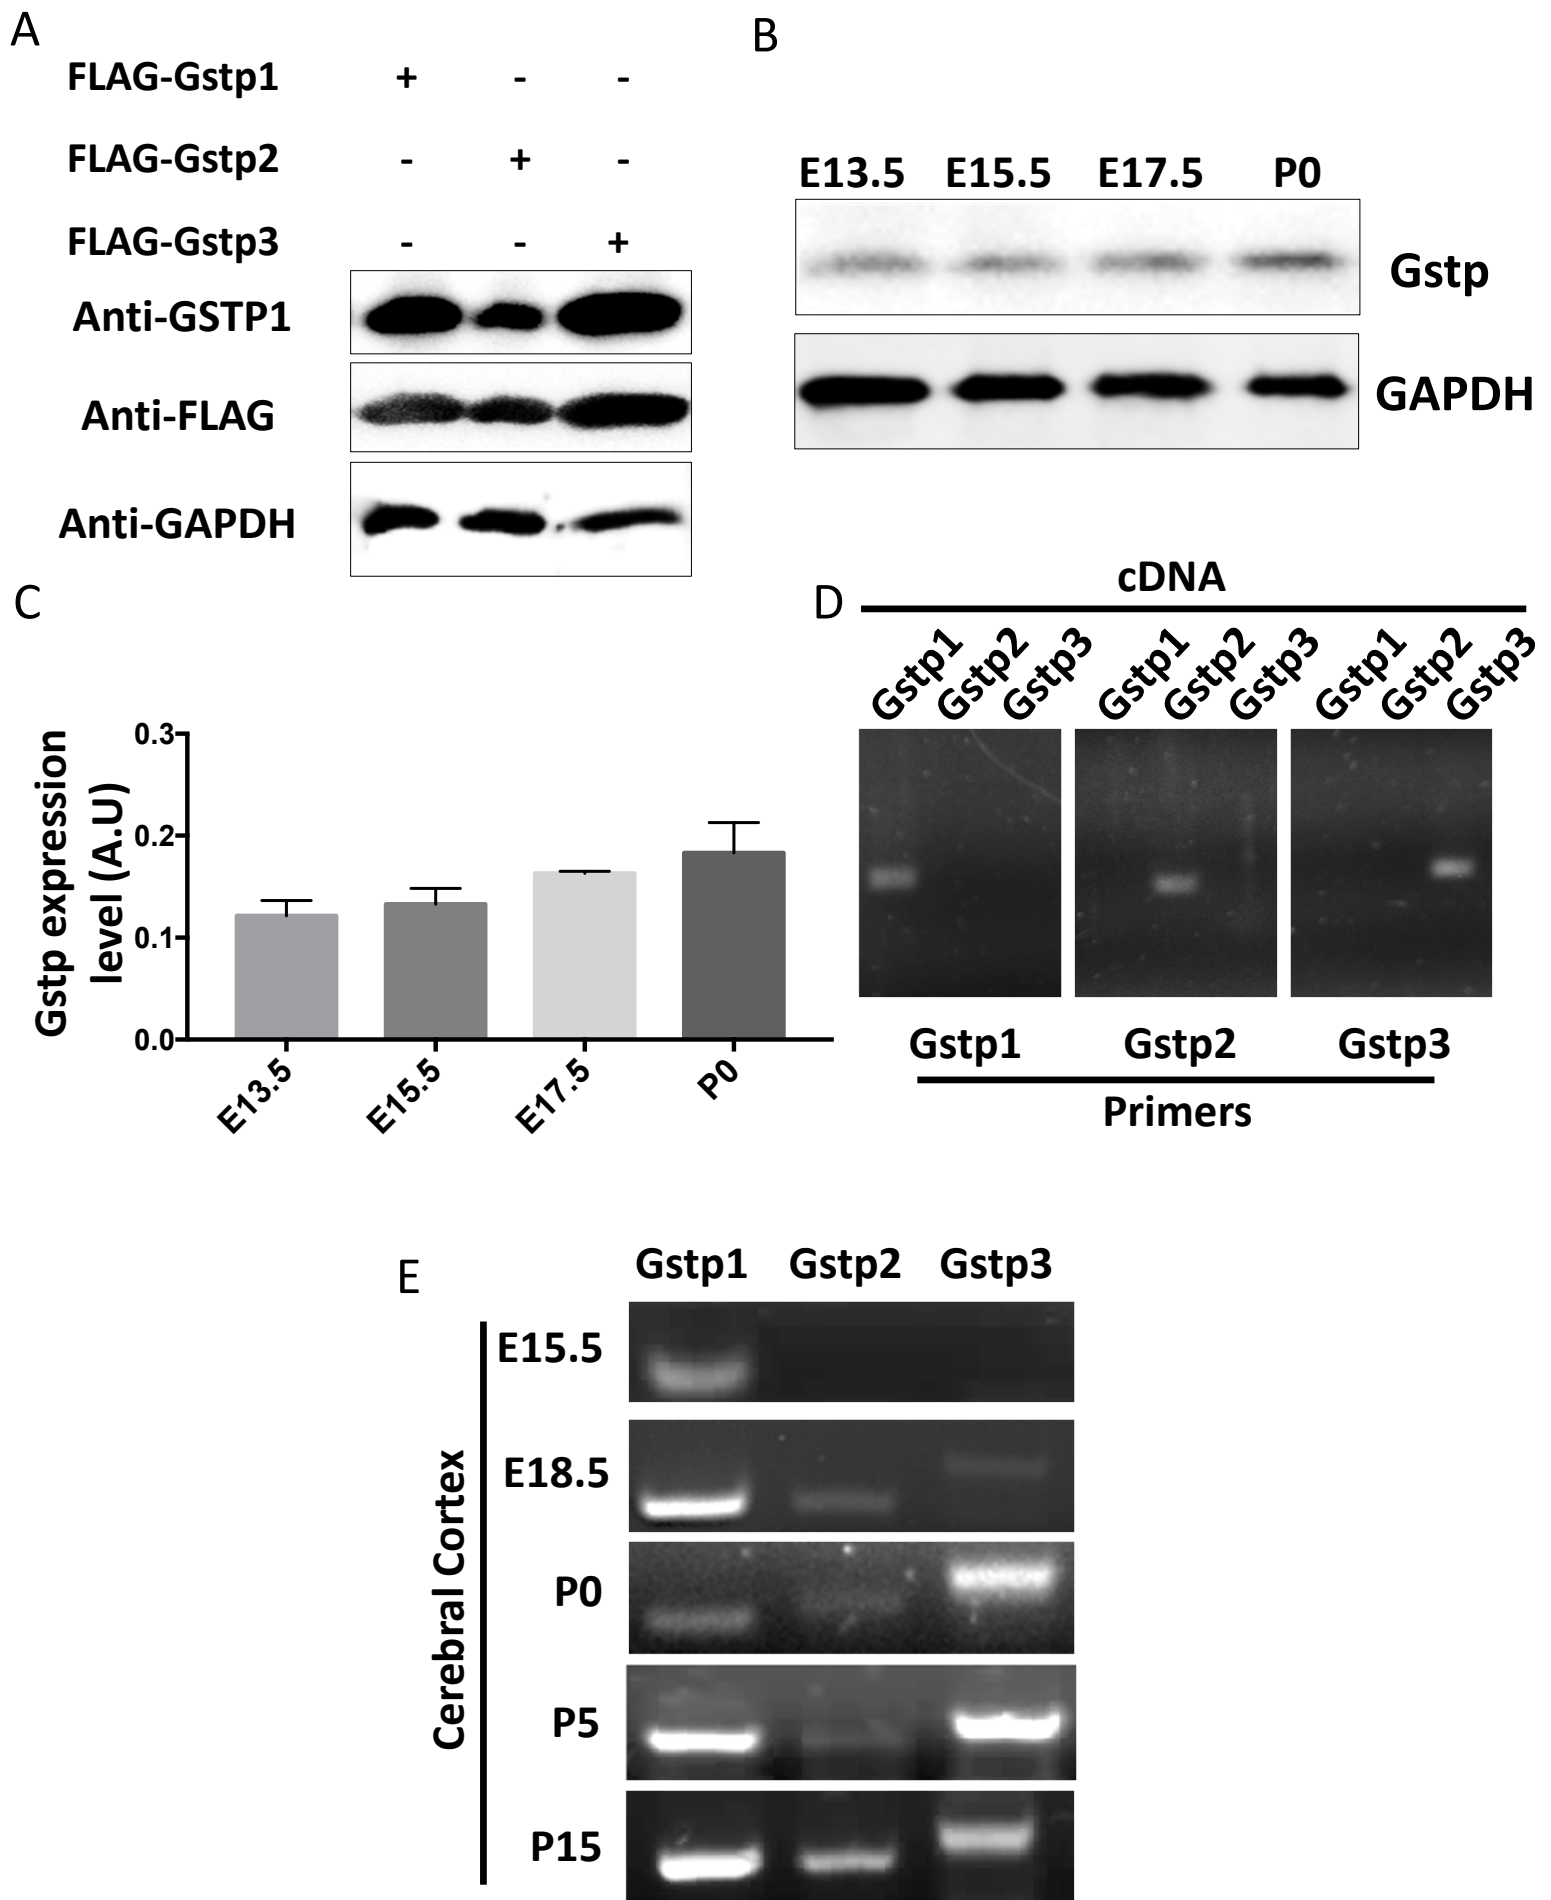



# Figure 1

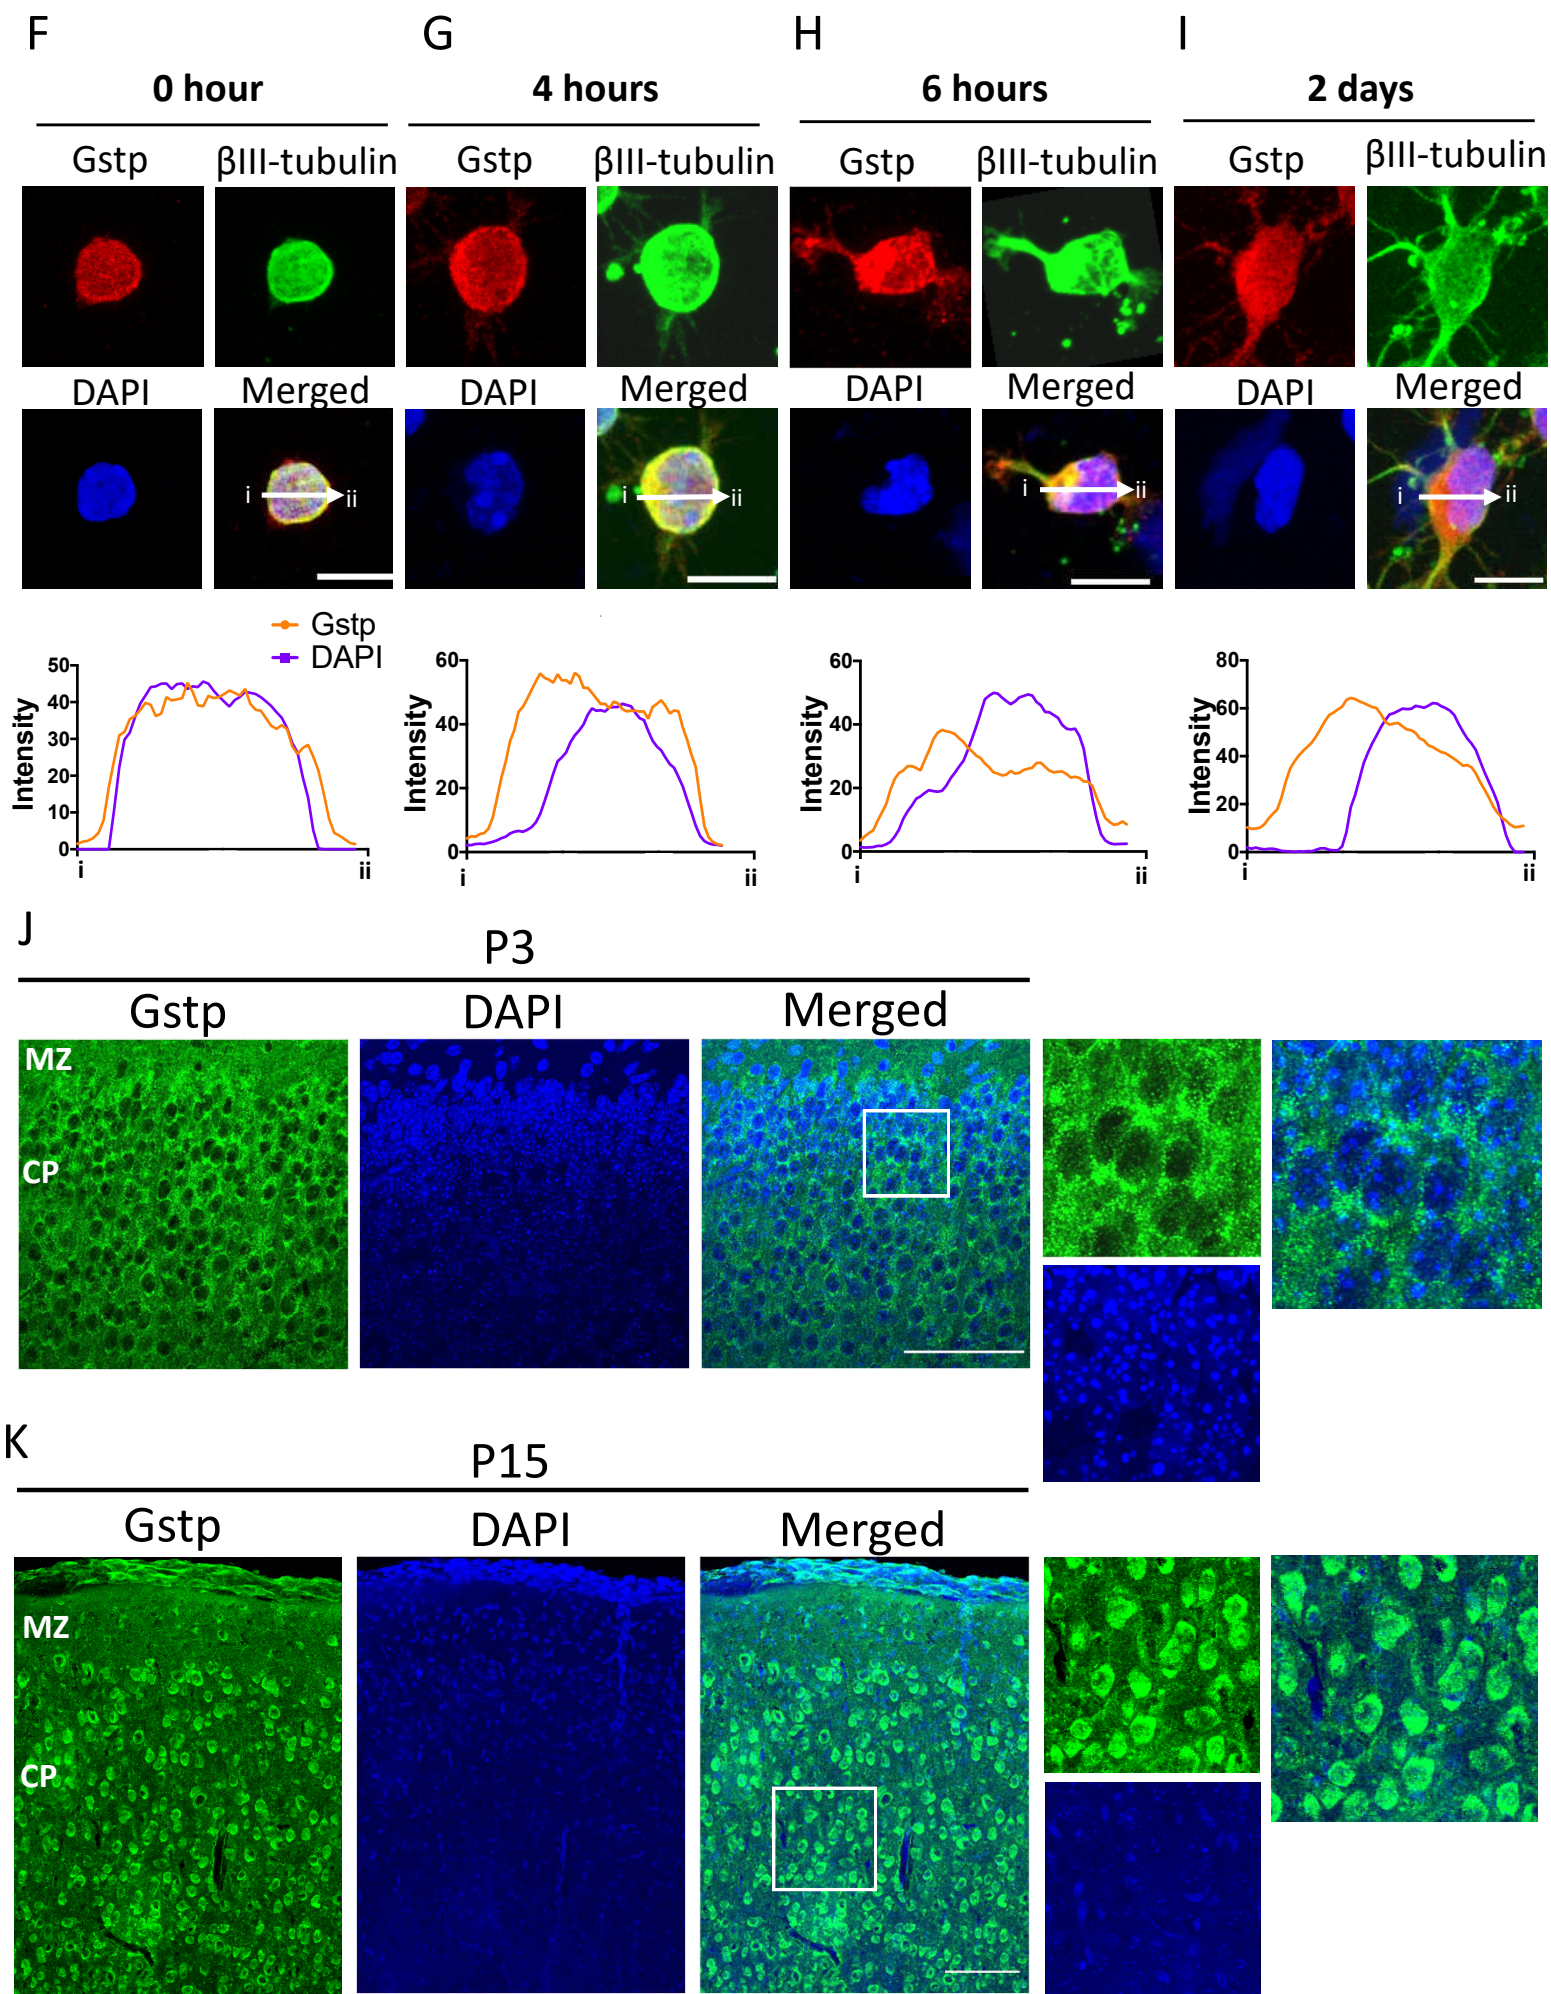



## Figure 2

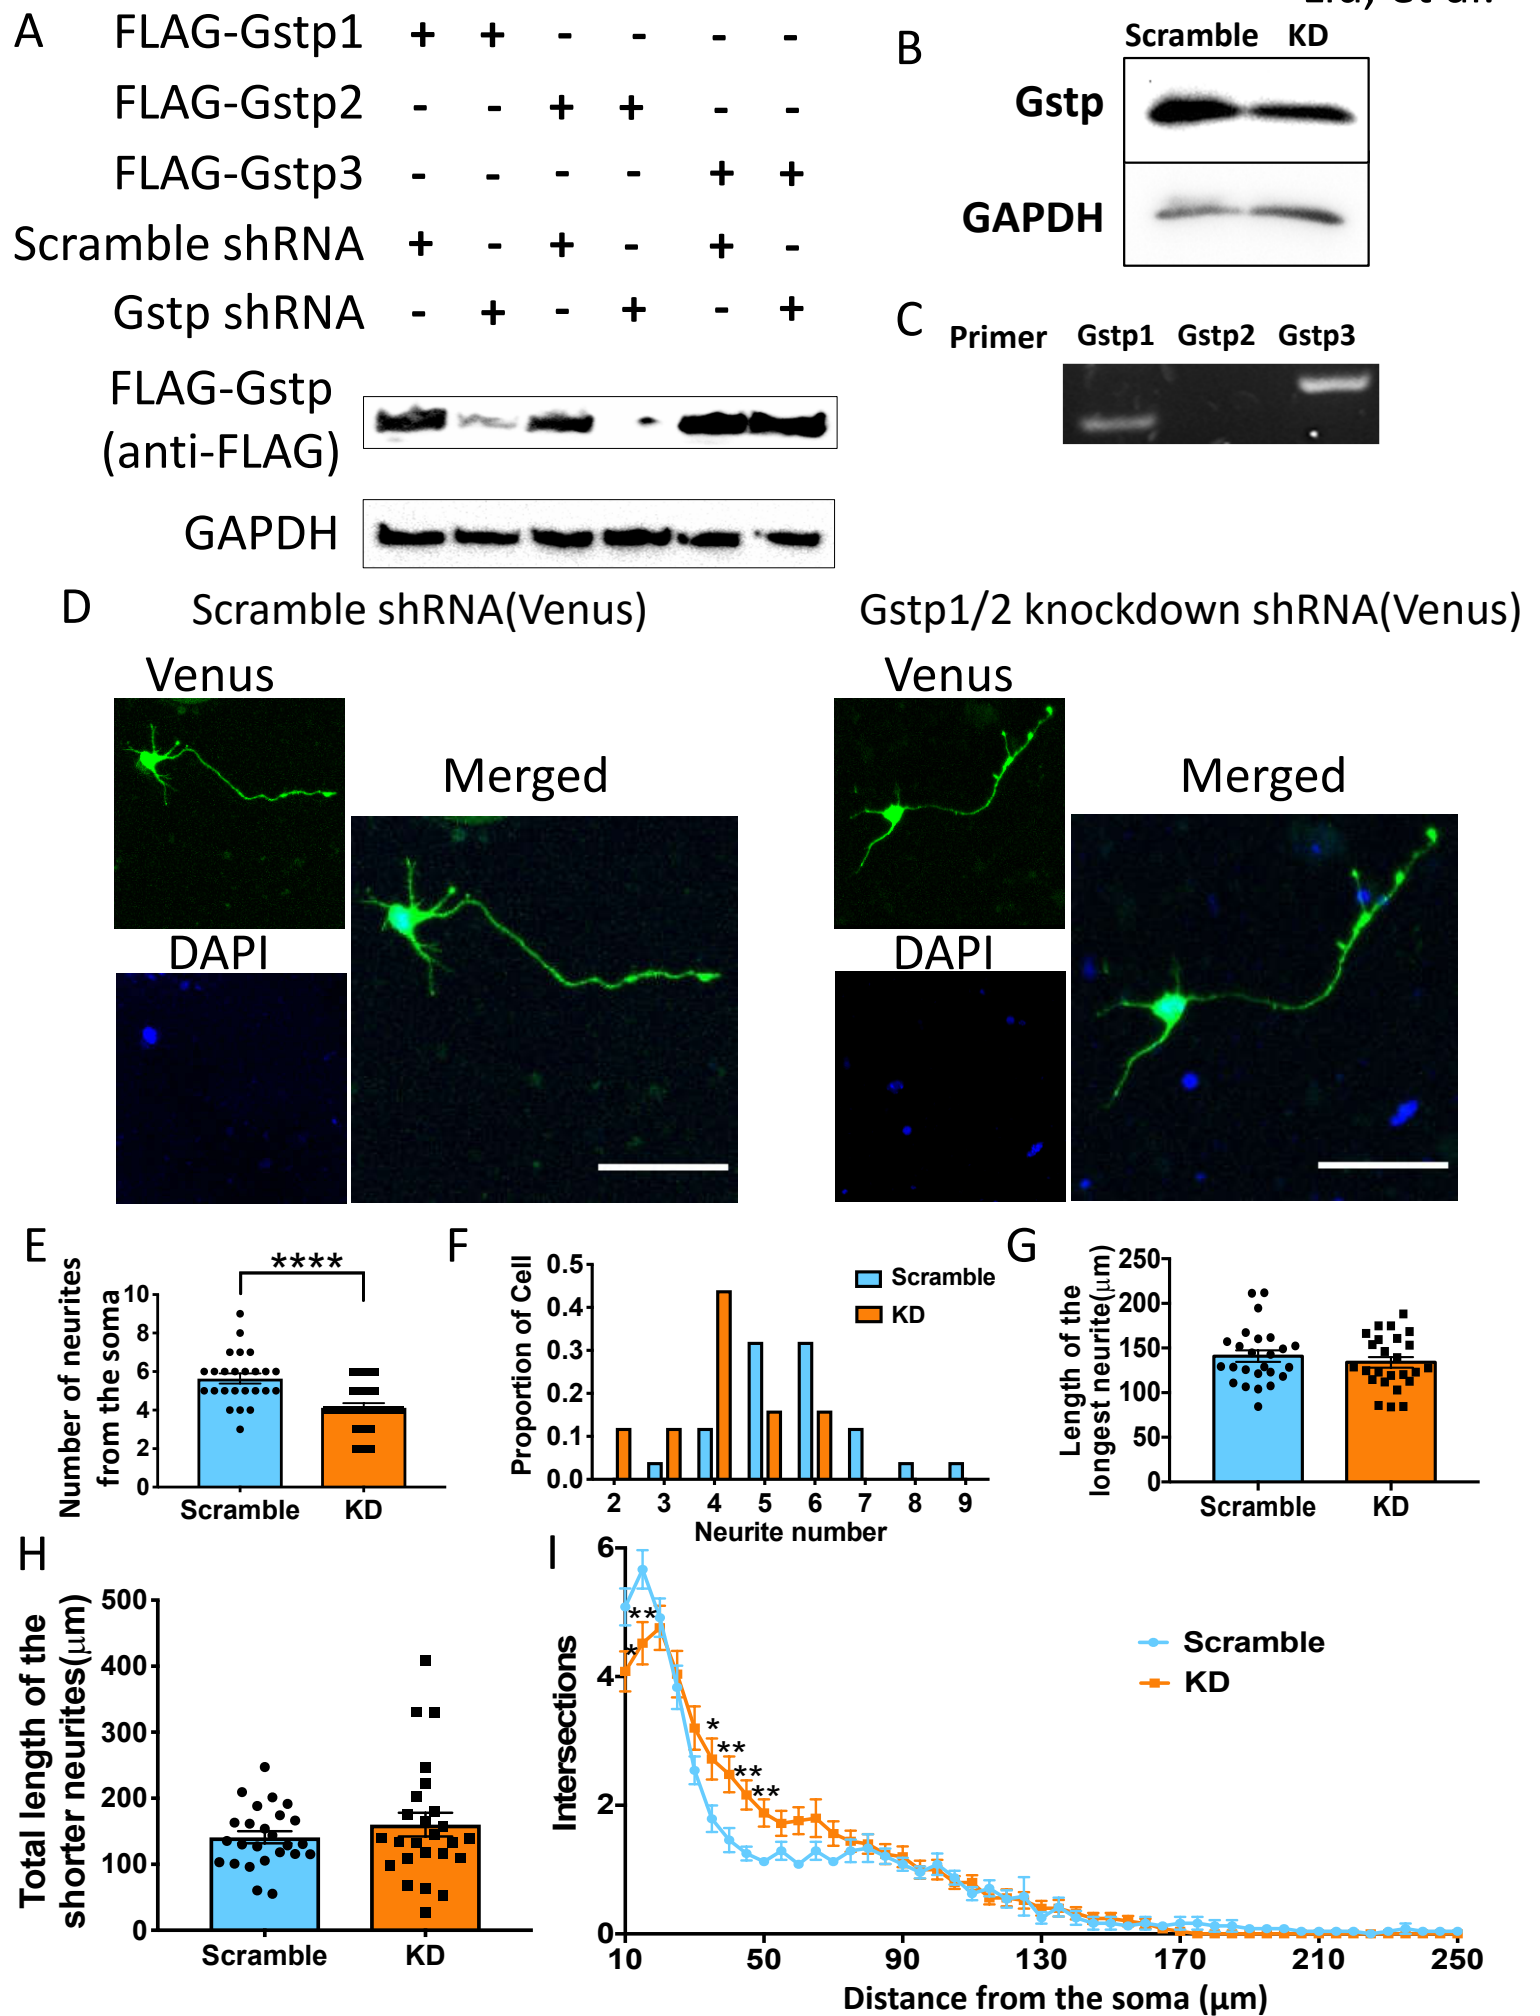

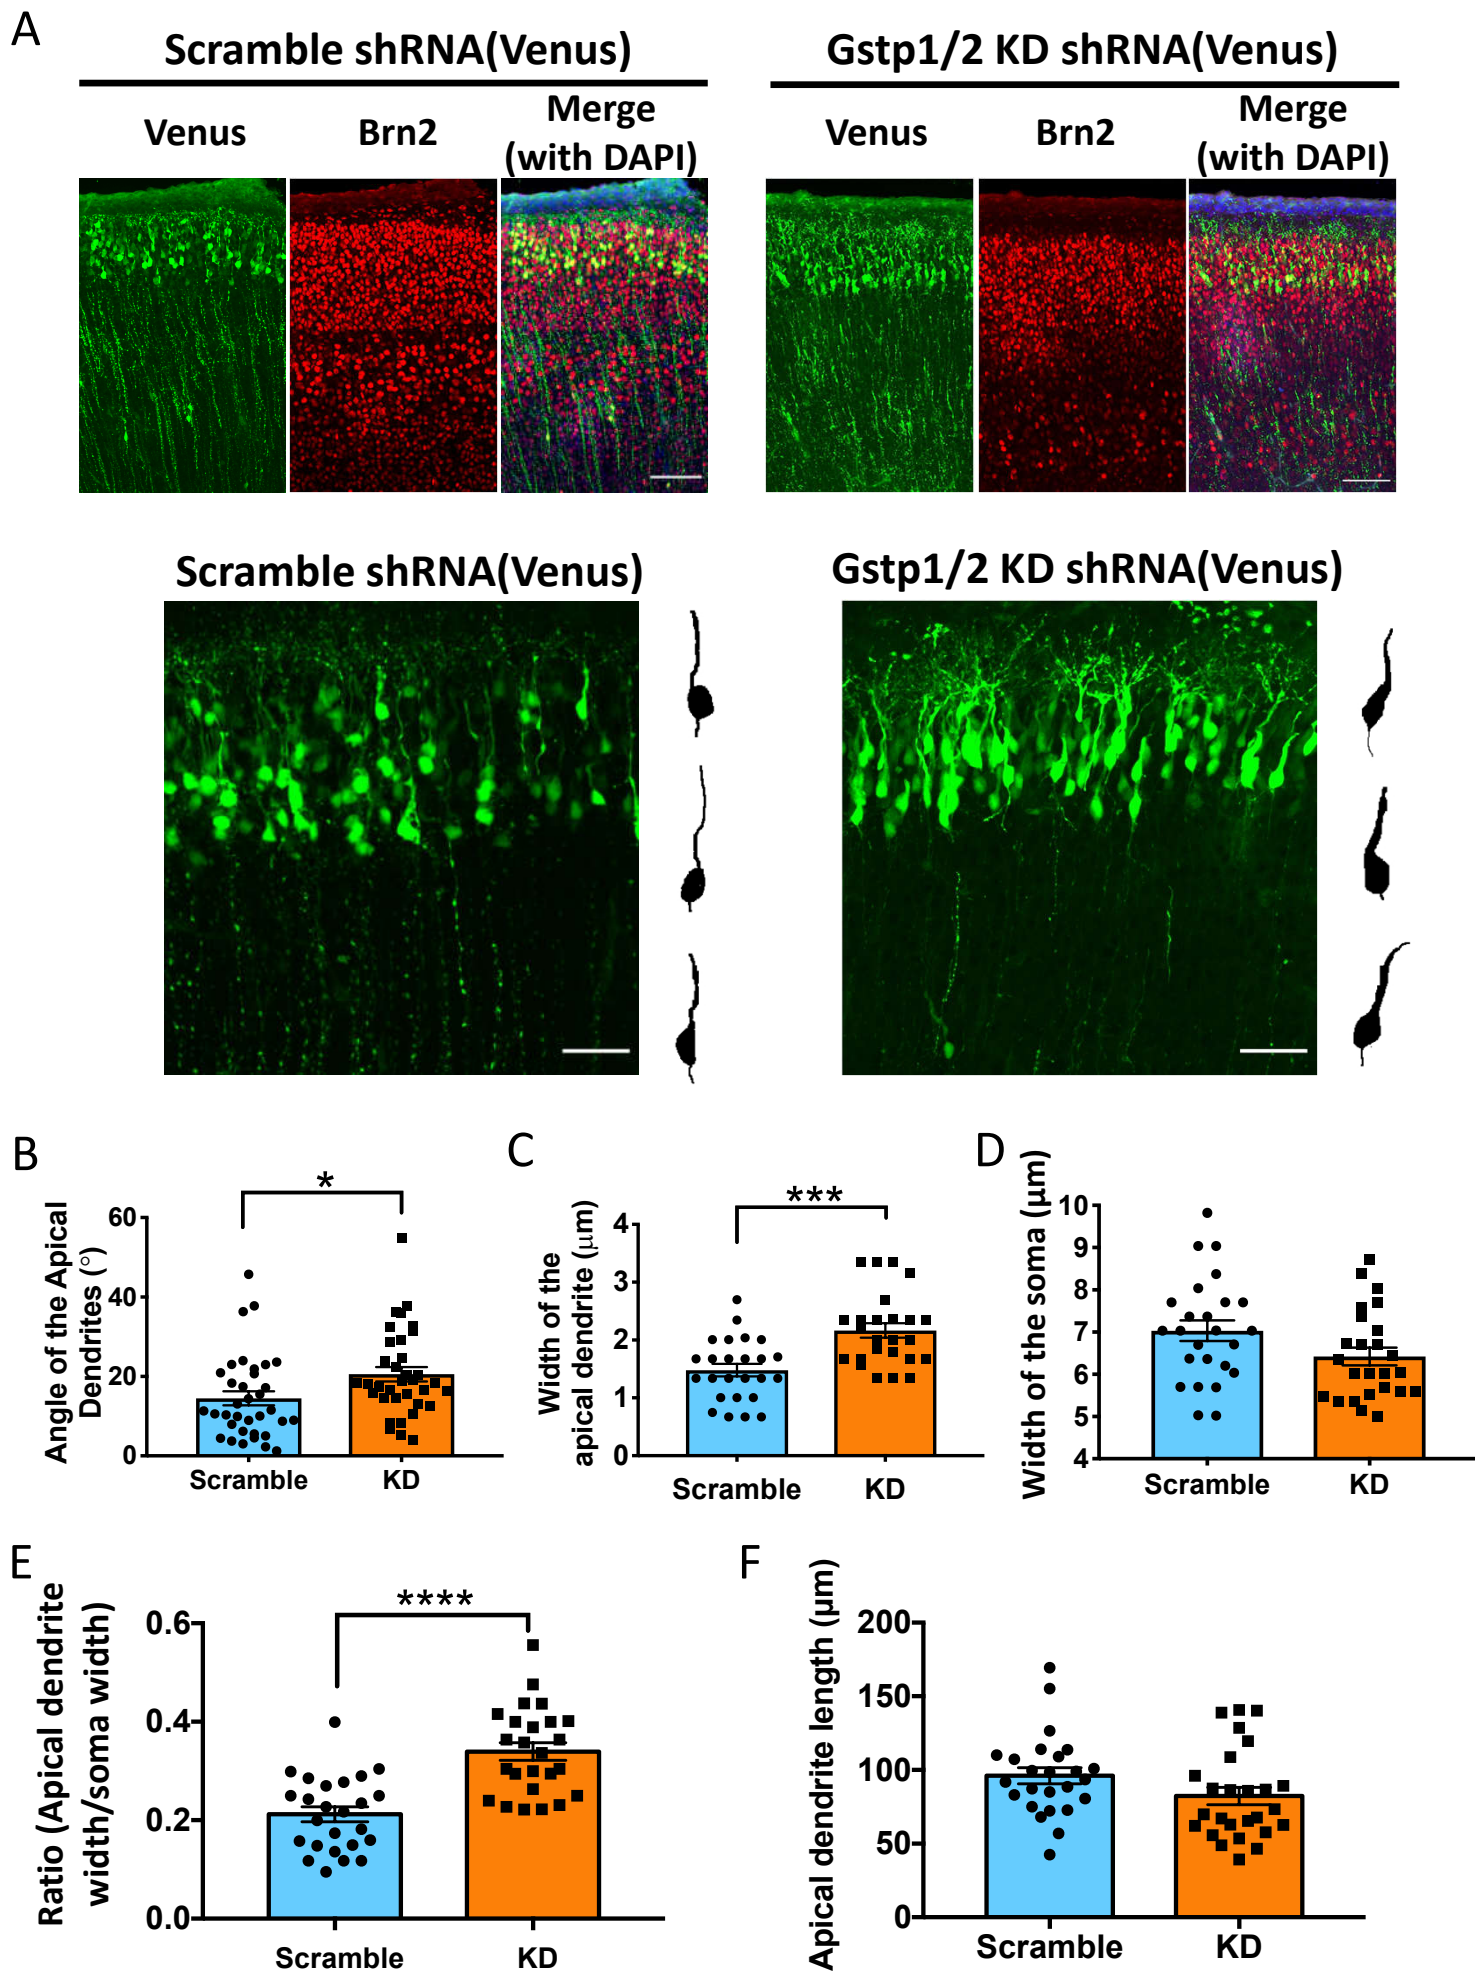

## IUE at E15.5 → Analyzed at P15

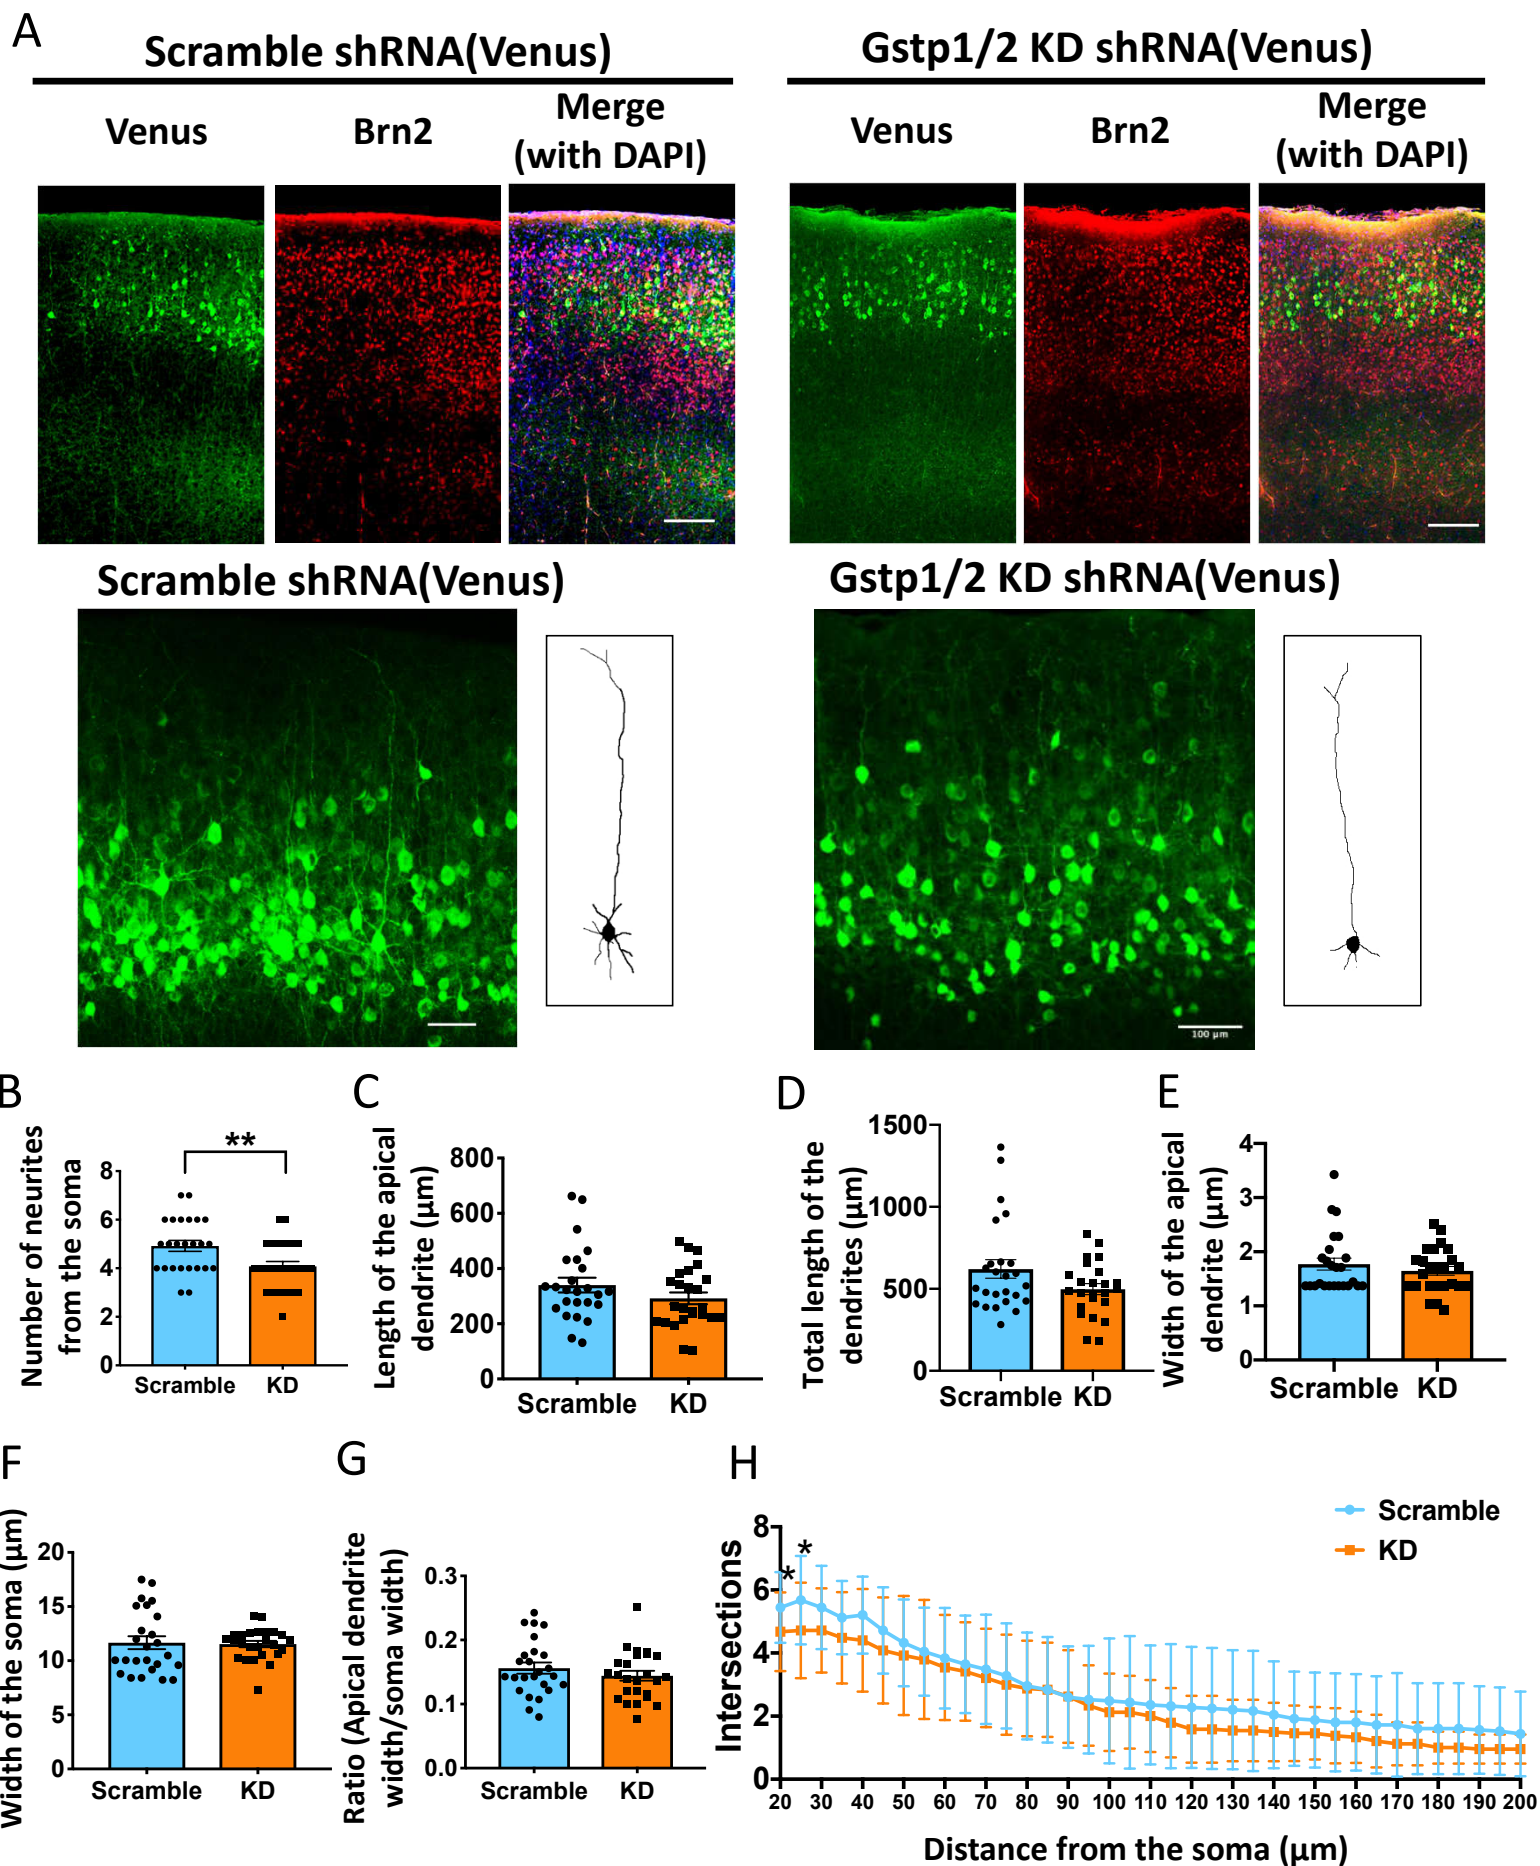



A IUE at E15.5 → Analyzed at P0

Apical dendrite  
Apical dendrite tip

B

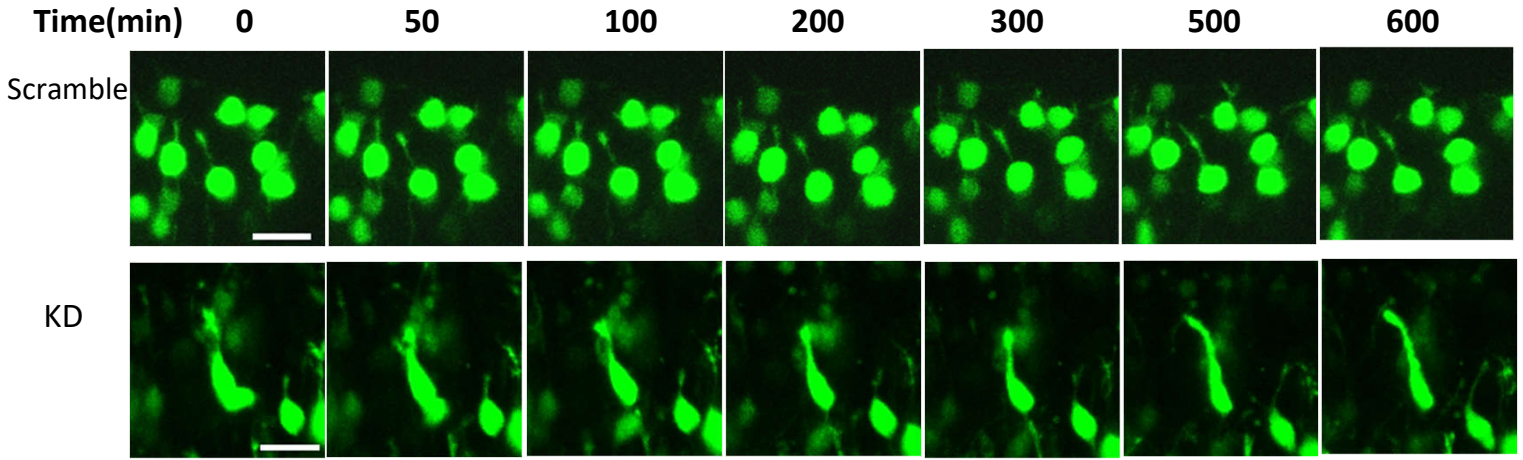

C

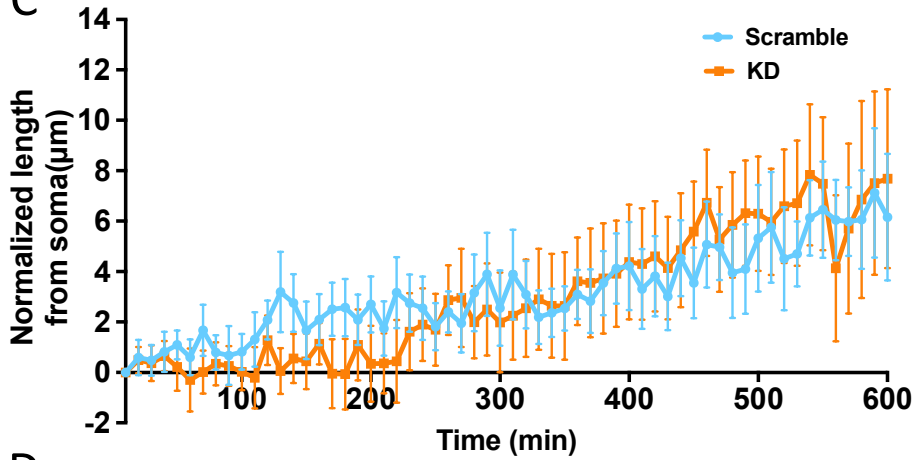

D

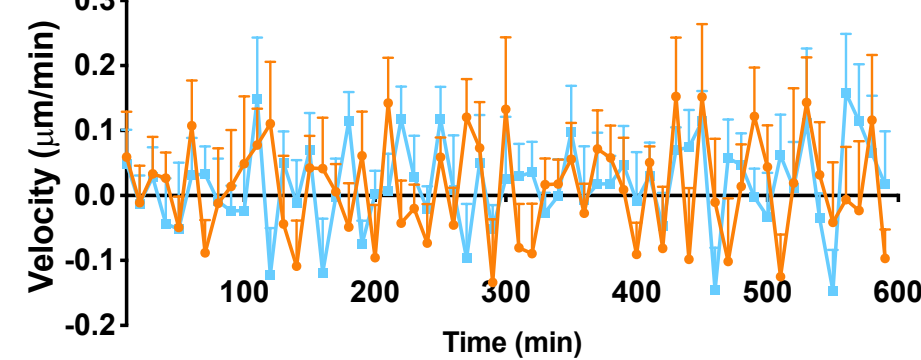

E

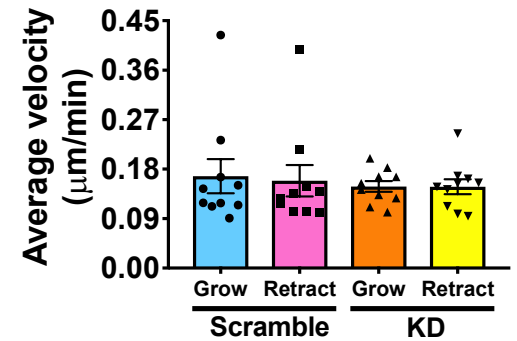

F

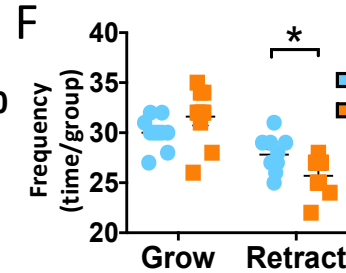

G

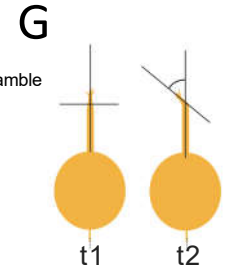

H

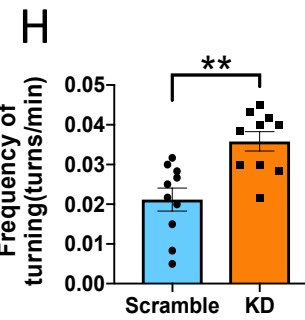

I

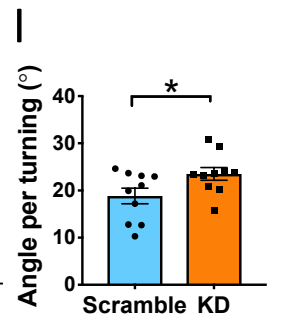

J

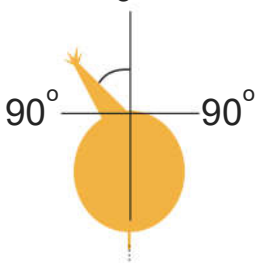

K

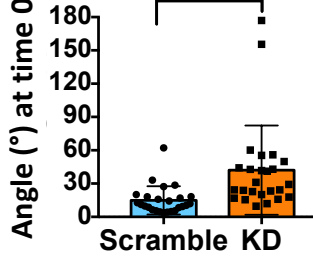

L

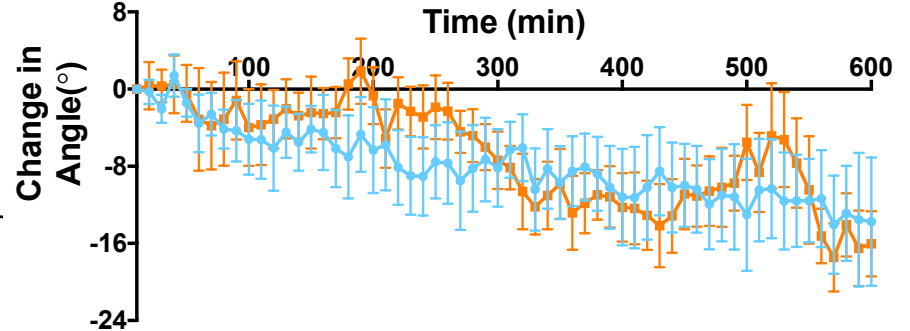

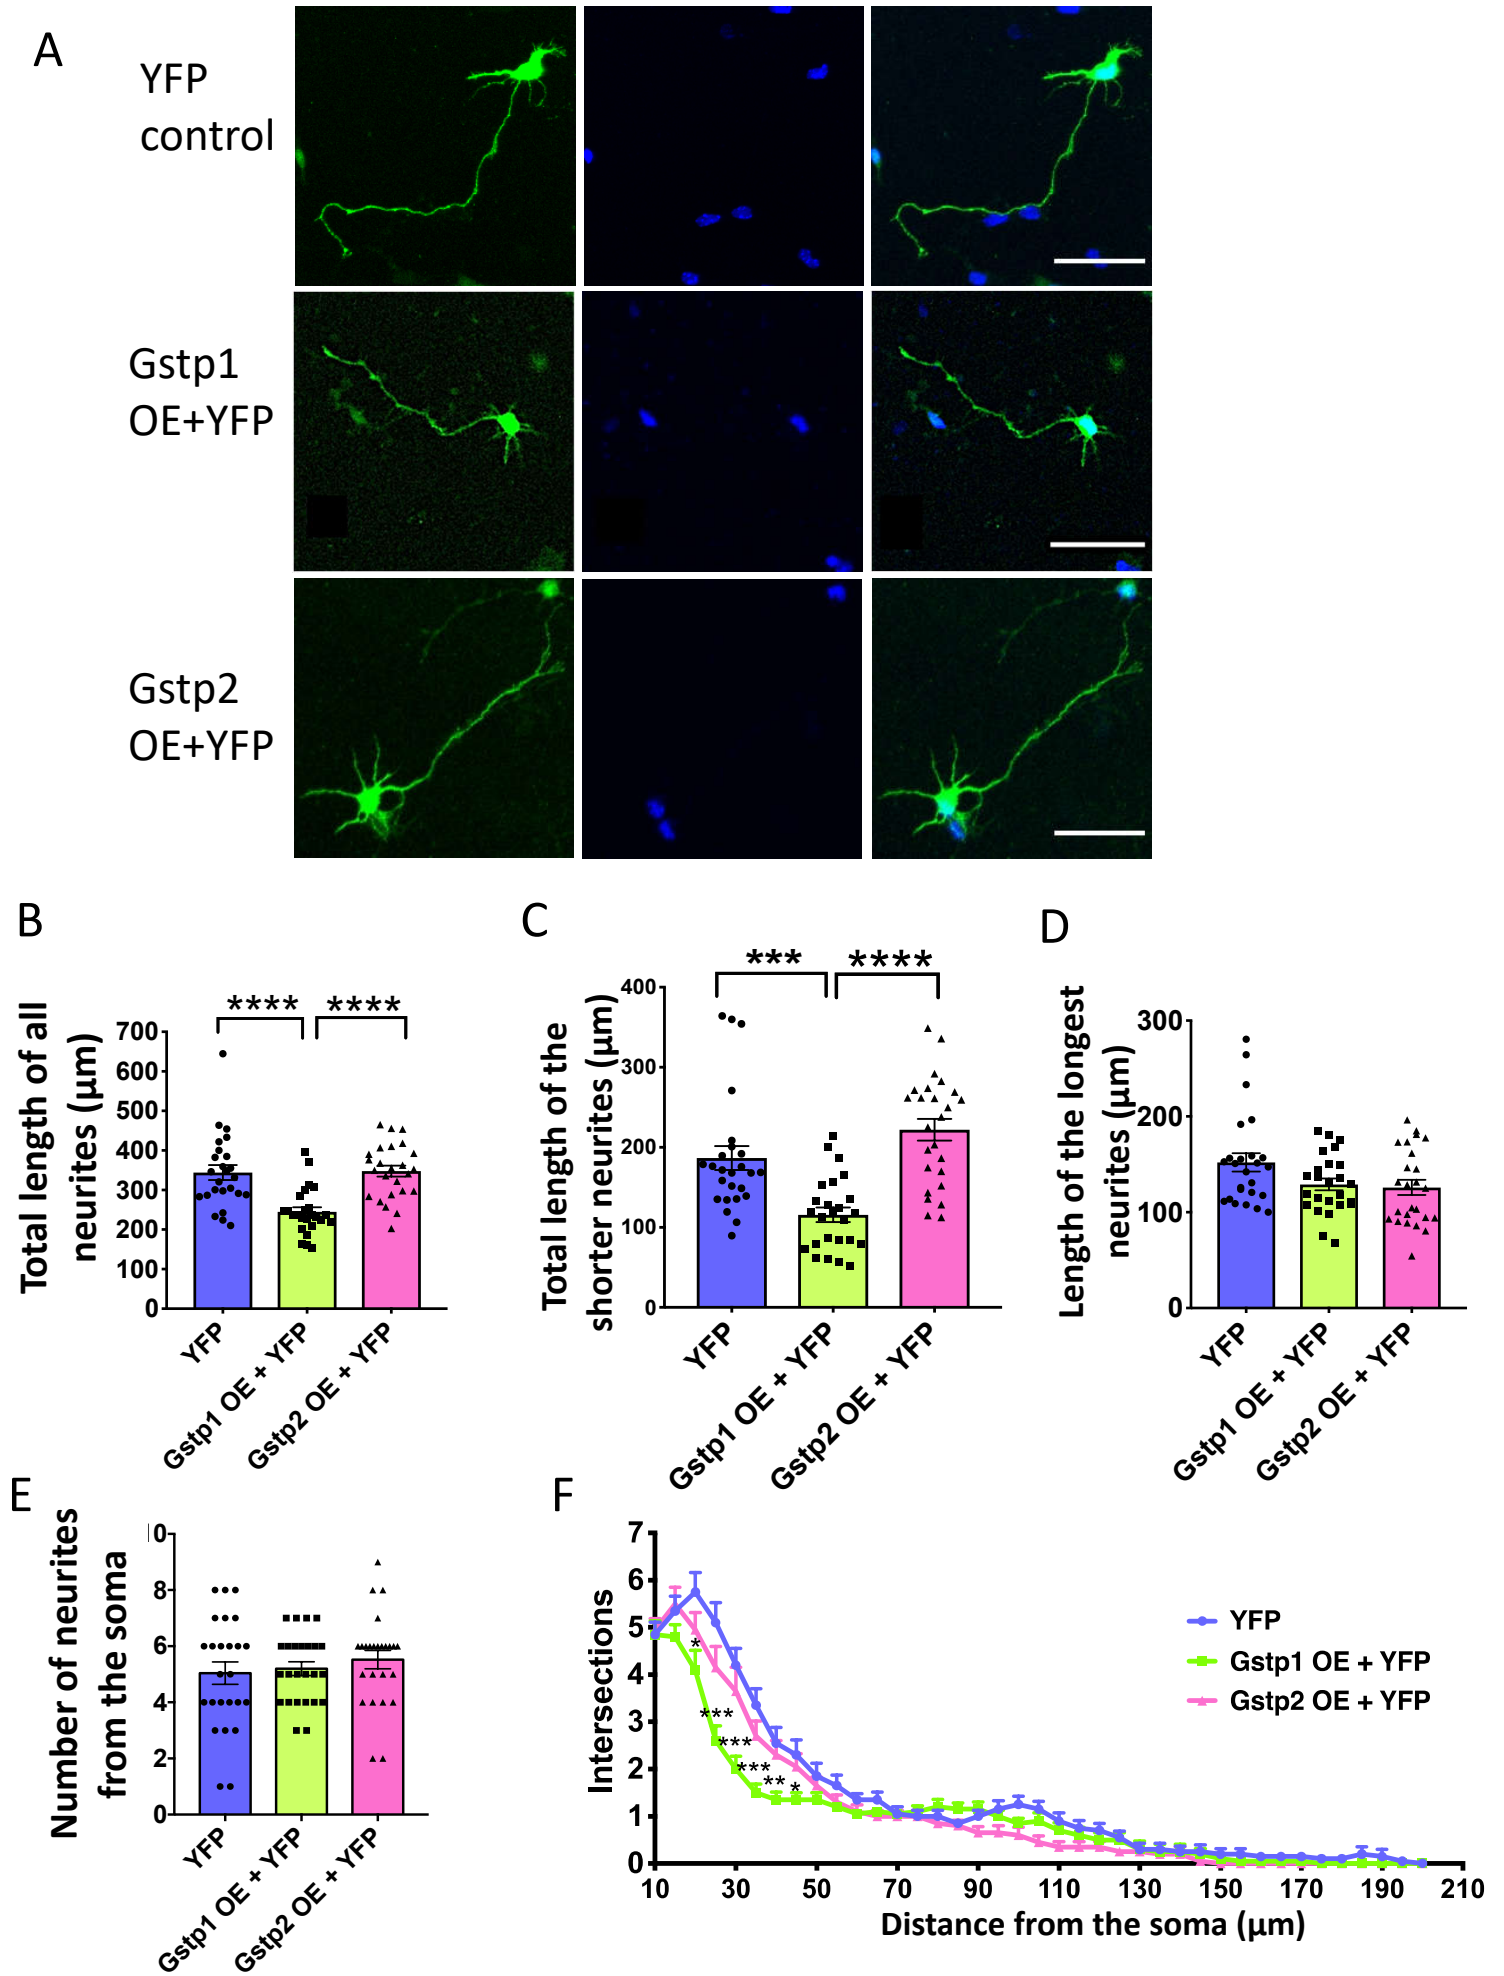

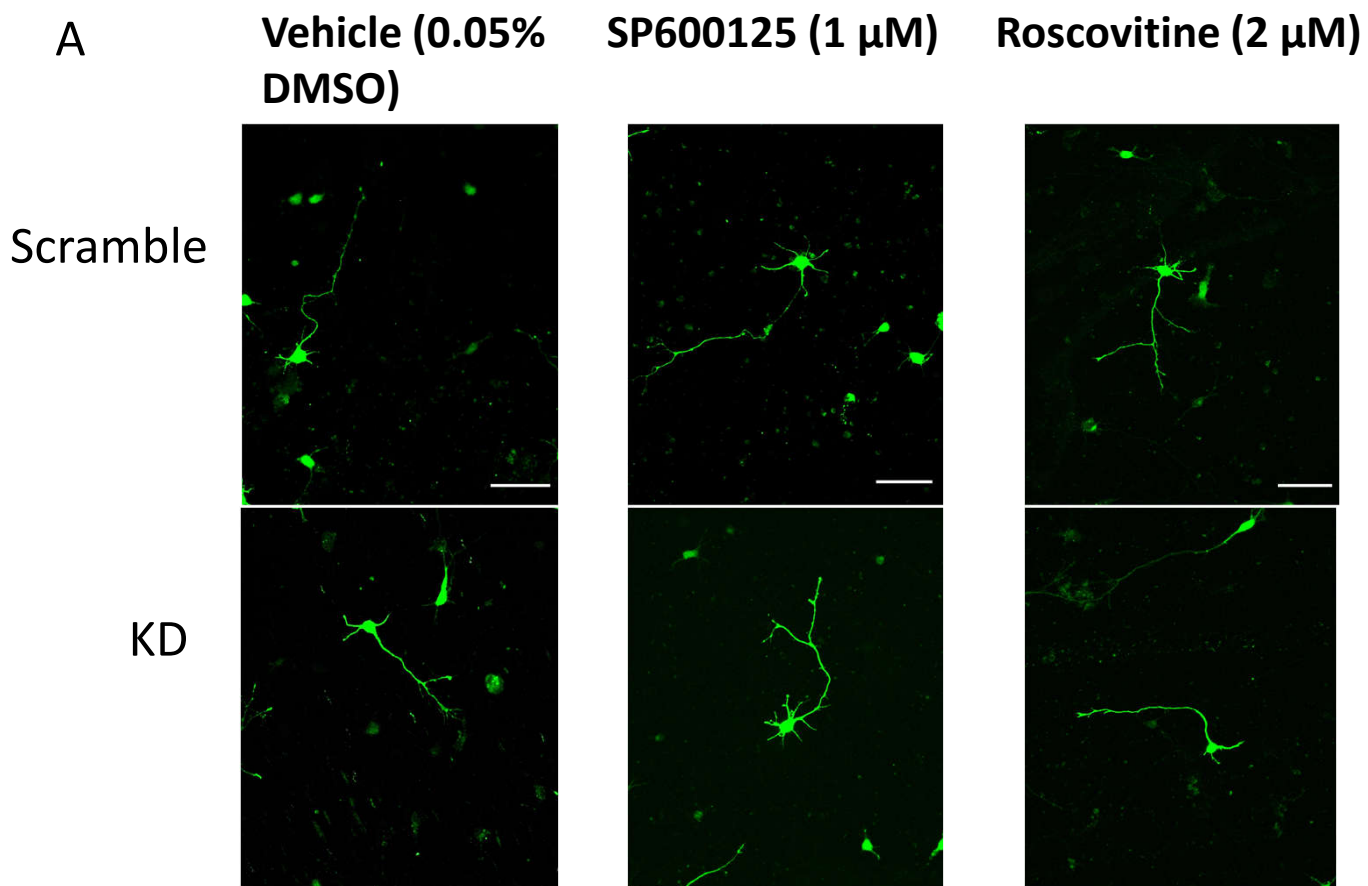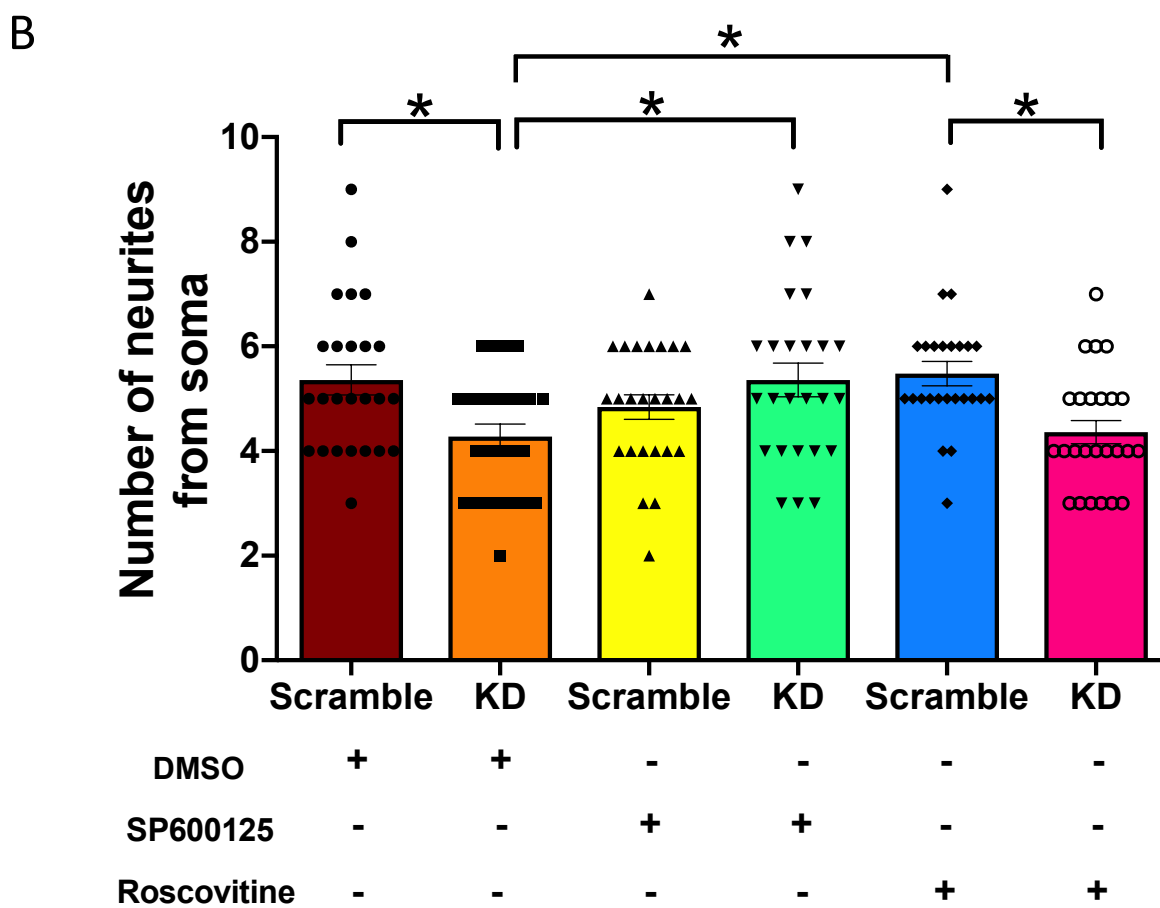

Source: https://www.biorxiv.org/content/10.1101/2020.05.21.103036v1.full.pdf
